# Supplementary material for: Detection of QTLs for Plant Height Architecture Traits in Rice (Oryza sativa L.) by Association Mapping and the RSTEP-LRT Method
Source: MDPI journal article supplement (doi:10.3390/plants11070999), 2022-04-06
Supplement: s1 [file s1]

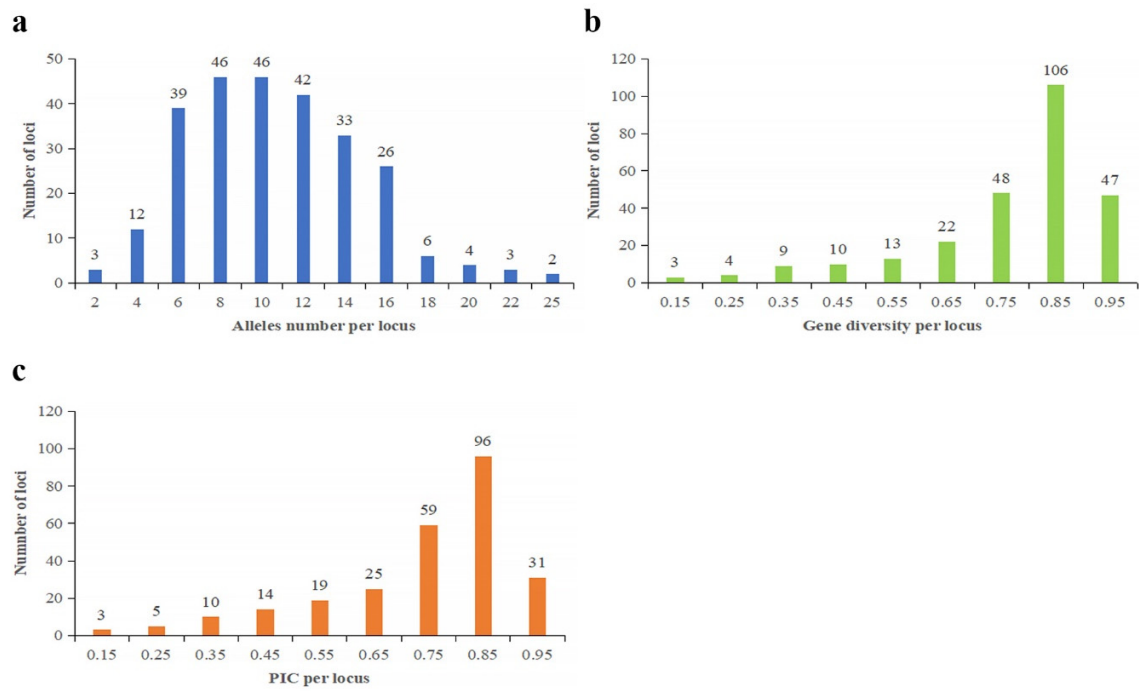

**Figure S1.** Distribution of genetic diversity of 262 SSR loci across 504 rice accessions. (a): Allele number per locus; (b): Genetic diversity per locus; (c): PIC per locus.

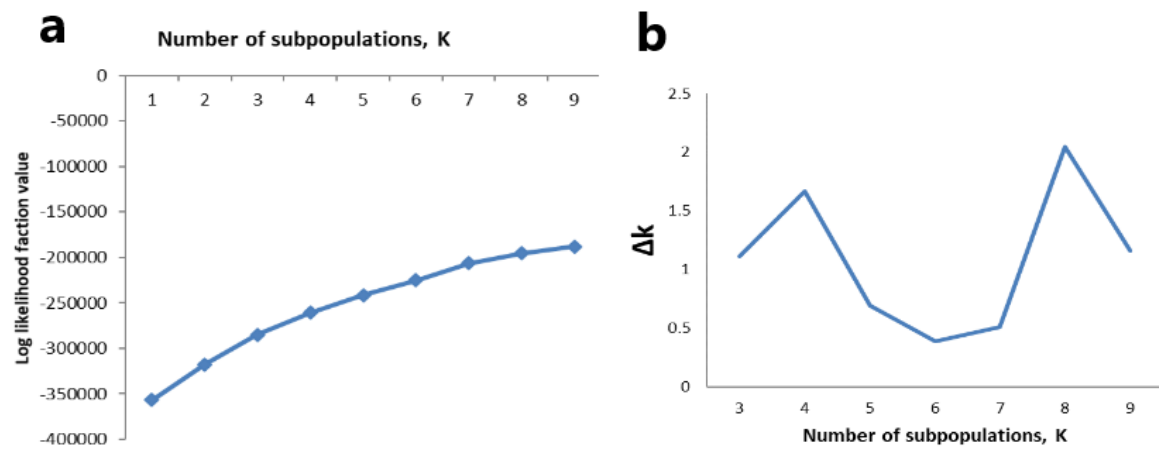

**Figure S2.** Changes in the log-likelihood function value (a), and in  $\Delta K$  values (b) with the number of subpopulations.

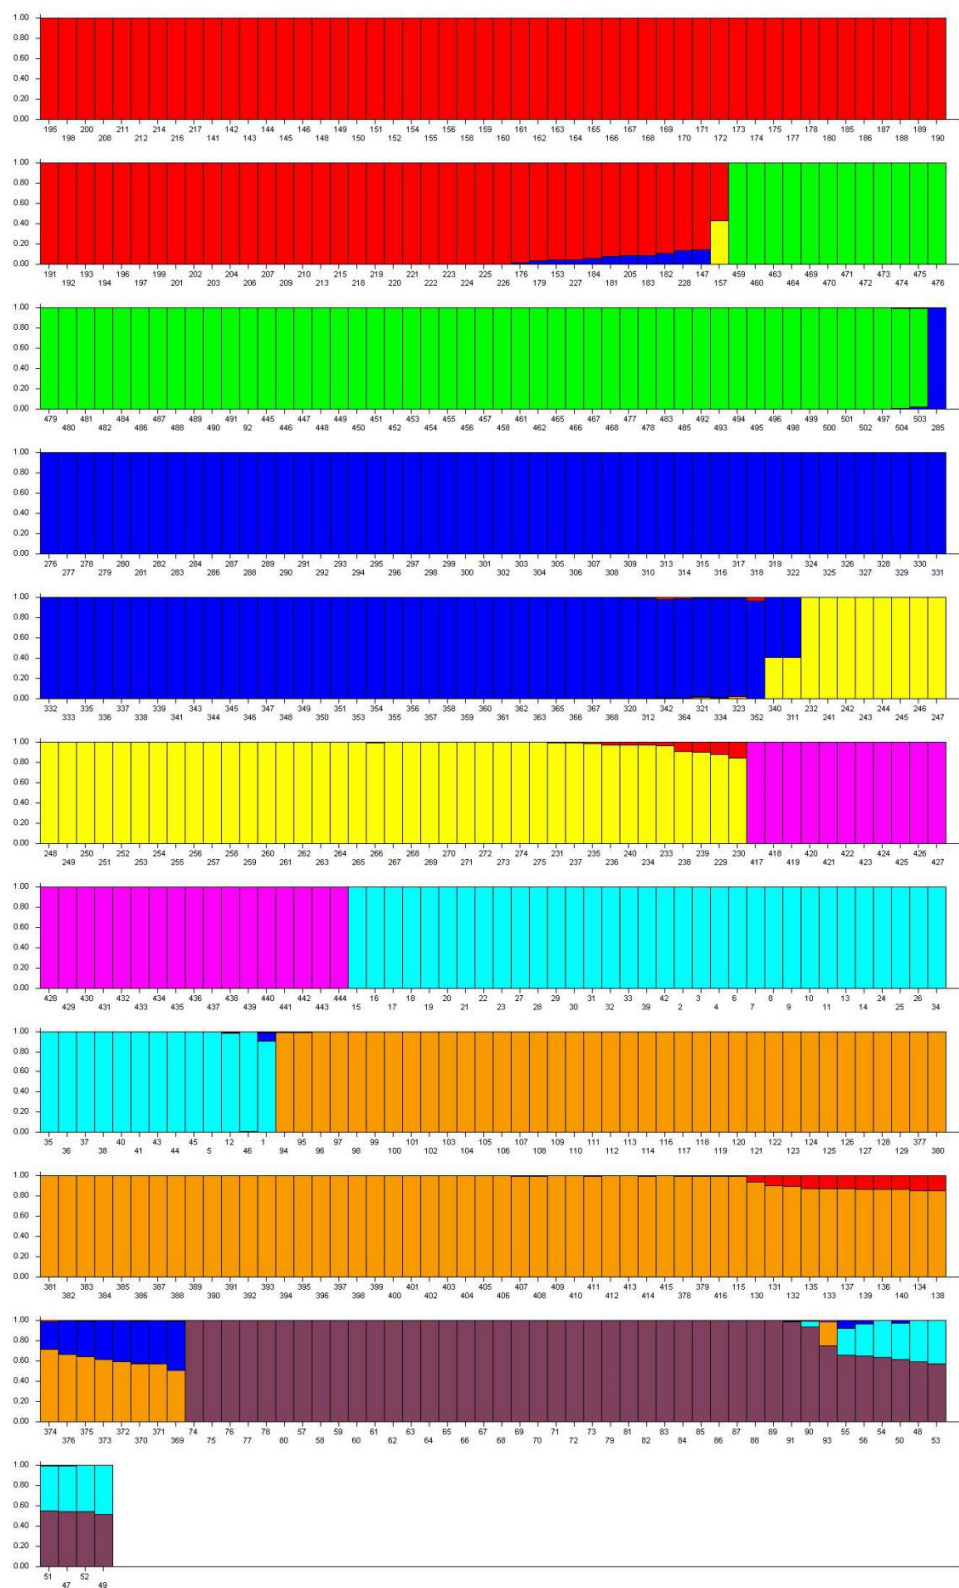

**Figure S3.** 504 rice variety belonging to eight subpopulations, calculated by STRUCTURE software. Each vertical bar represents an accession and within each vertical bar, the colored subsections represent membership coefficient (Q) of

the accession to different clusters. Identified subpopulations are Sub-pop 1 (red color), Sub-pop 2 (green color), Sub-pop 3 (navy blue color), Sub-pop 4 (yellow color), Sub-pop 5 (pink color), Sub-pop 6 (light blue color), Sub-pop 7 (brown color) and Sub-pop 8 (purple color). The numbers in the X-axis stand for variety code corresponding to Table S1.

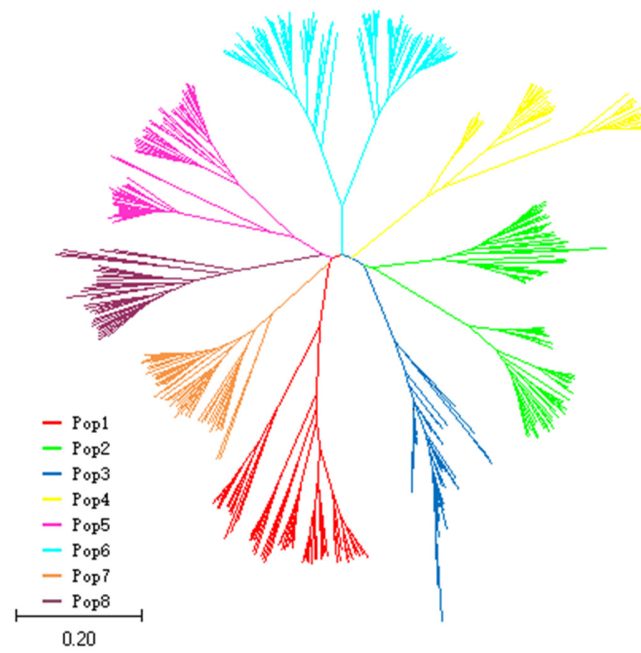

**Figure S4.** Neighbor joining tree for the 504 accessions constructed using Nei's (1983) genetic distance.

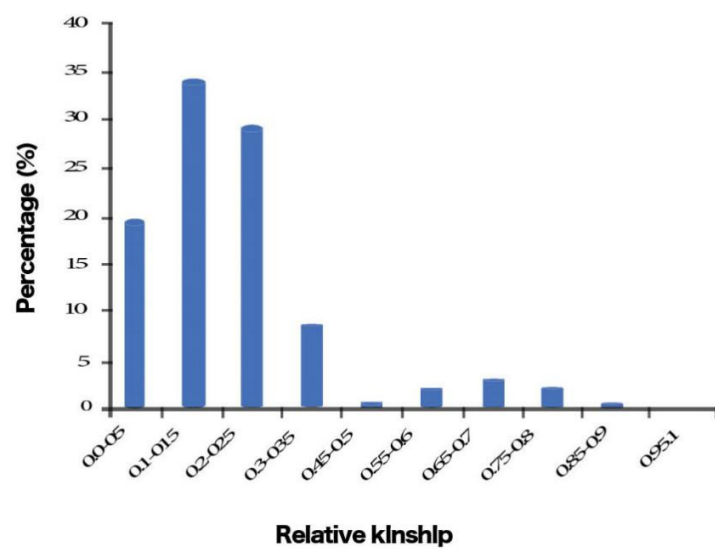

**Figure S5.** Distribution of pair-wise kinship coefficients among 474 rice accessions based on 262 SSR markers.

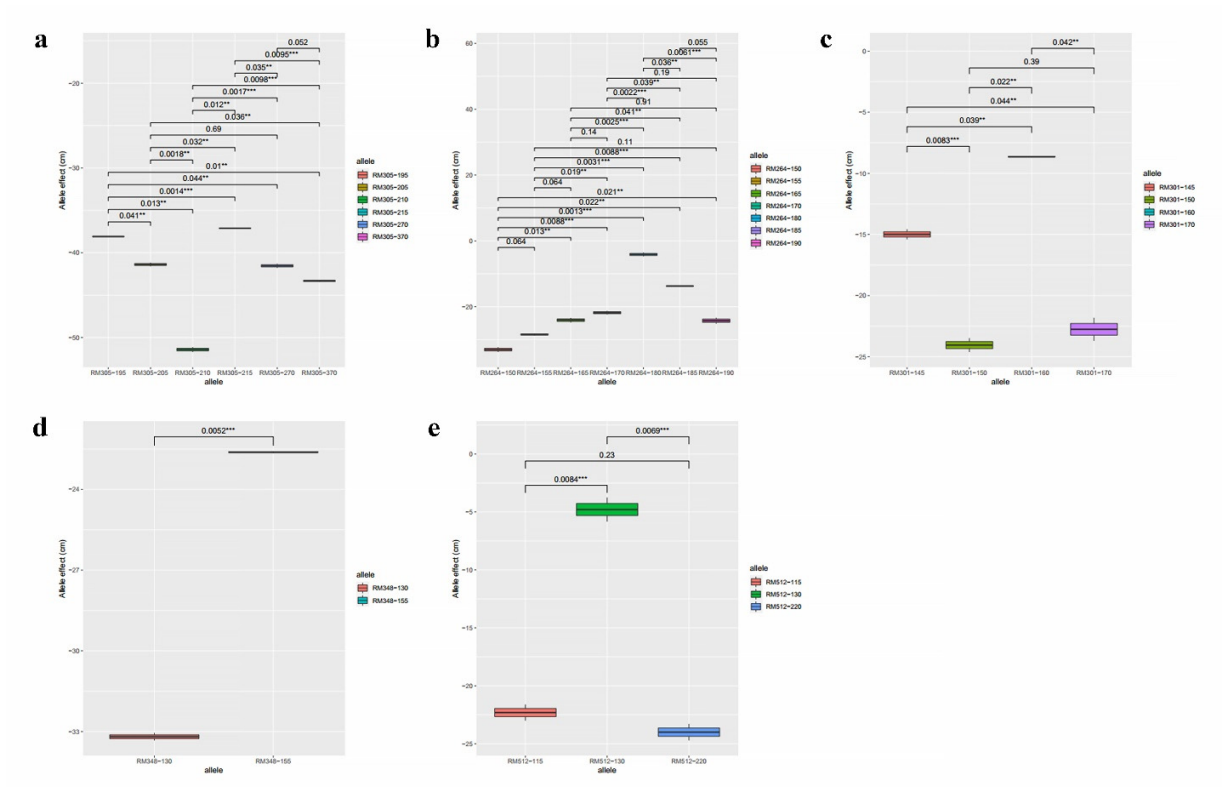

**Figure S6.** Pairwise *t* test for plant height. \*\* and \*\*\* denote significant at  $P<0.05$  and  $P<0.01$ , respectively.

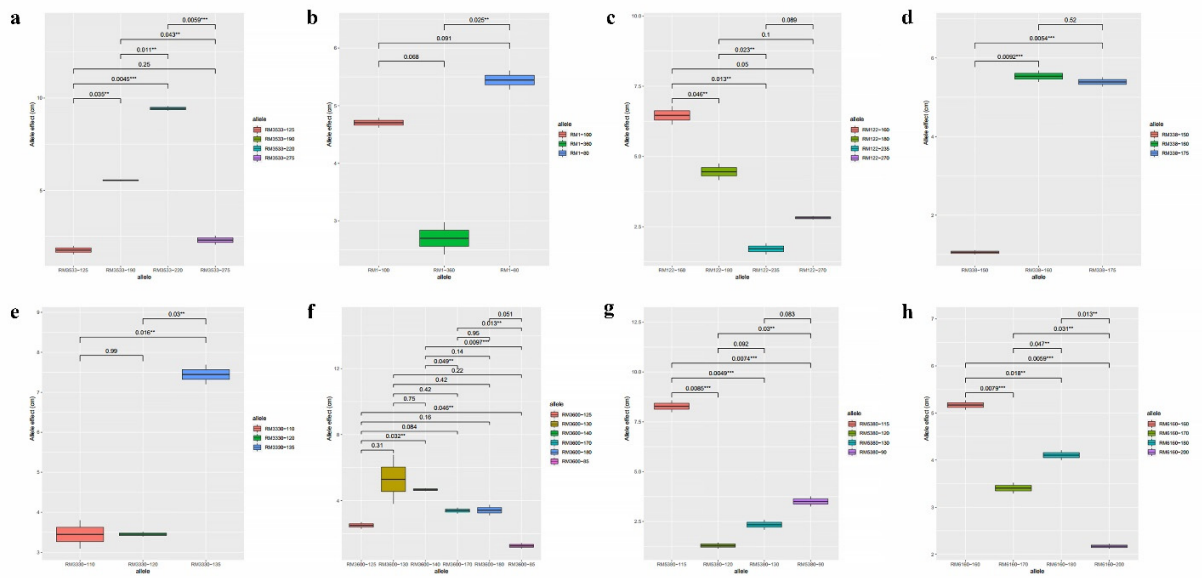

Figure S7. Pairwise *t* test for panicle length. \*\* and \*\*\* denote significant at  $P < 0.05$  and  $P < 0.01$ , respectively.



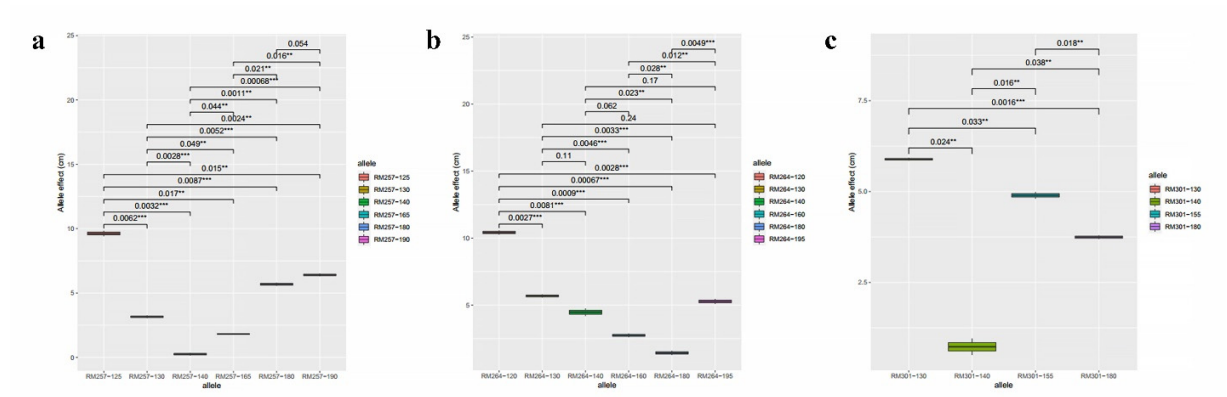

**Figure S8.** Pairwise *t* test for first internode. \*\* and \*\*\* denote significant at  $P<0.05$  and  $P<0.01$ , respectively.

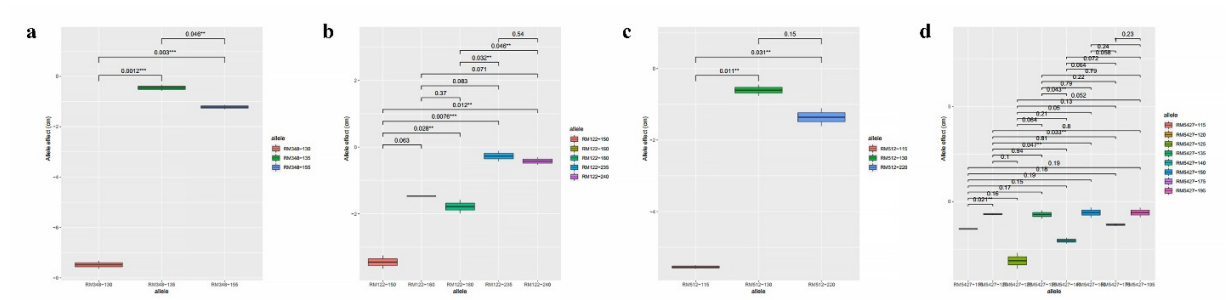

**Figure S9.** Pairwise  $t$  test for second internode. \*\* and \*\*\* denote significant at  $P<0.05$  and  $P<0.01$ , respectively.

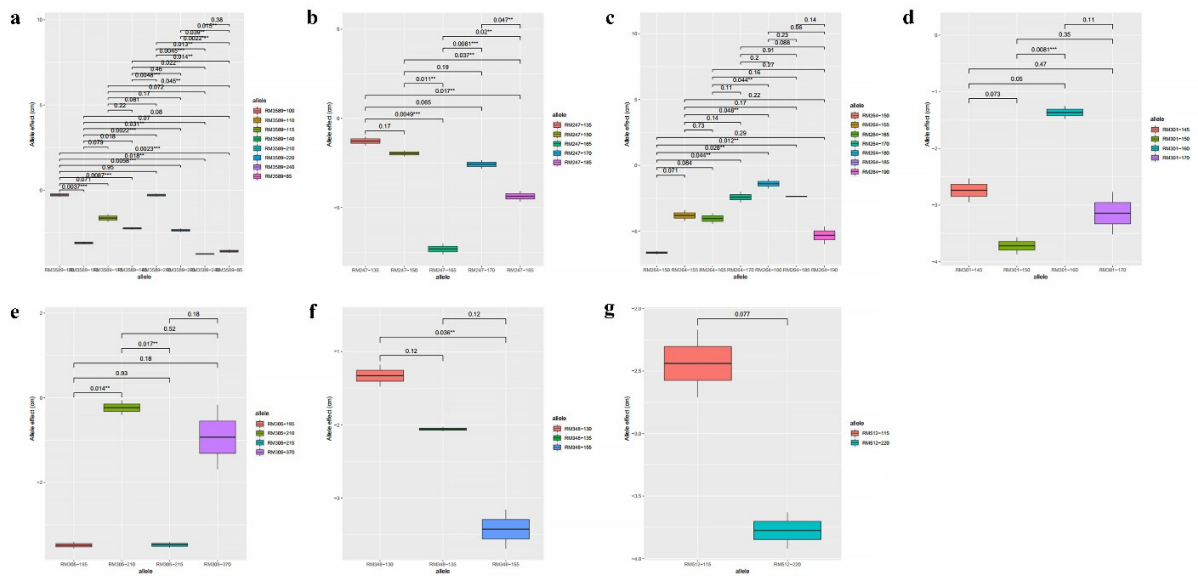

Figure S10. Pairwise  $t$  test for third internode. \*\* and \*\*\* denote significant at  $P < 0.05$  and  $P < 0.01$ , respectively.

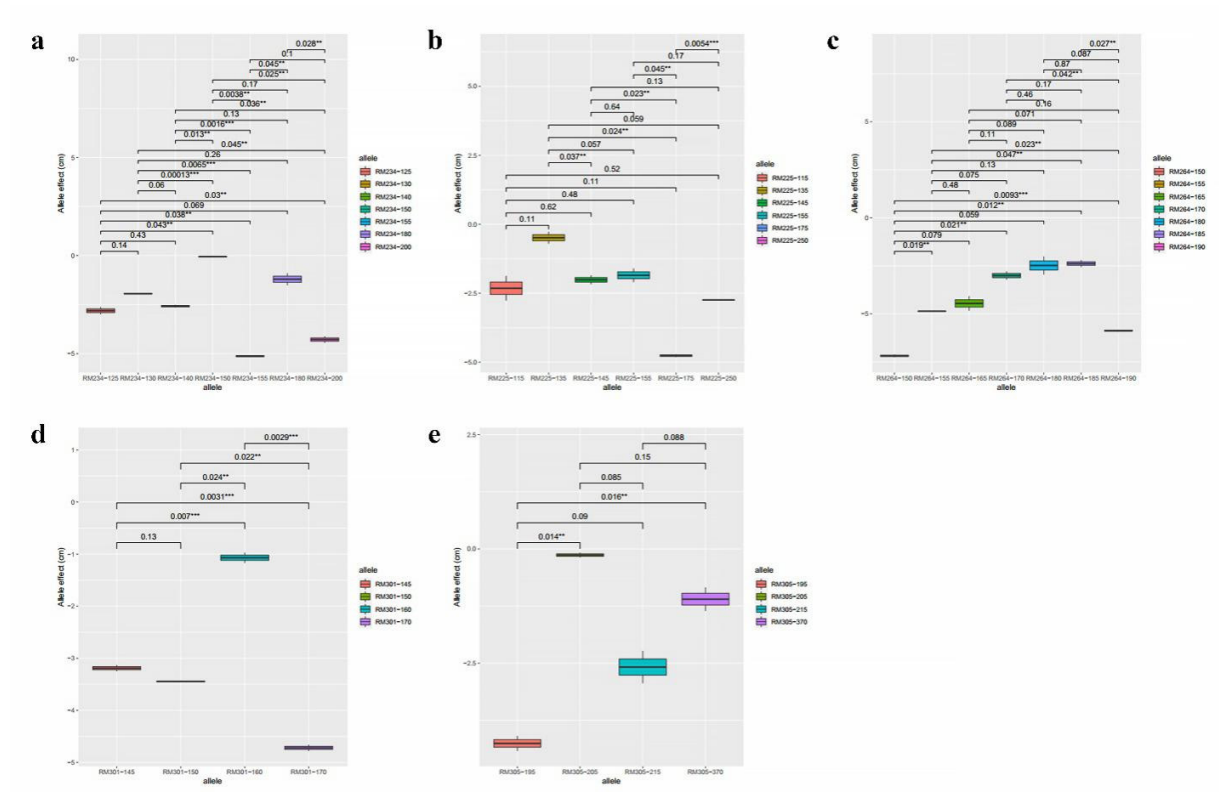

**Figure S11.** Pairwise  $t$  test for fourth internode. \*\* and \*\*\* denote significant at  $P < 0.05$  and  $P < 0.01$ , respectively.

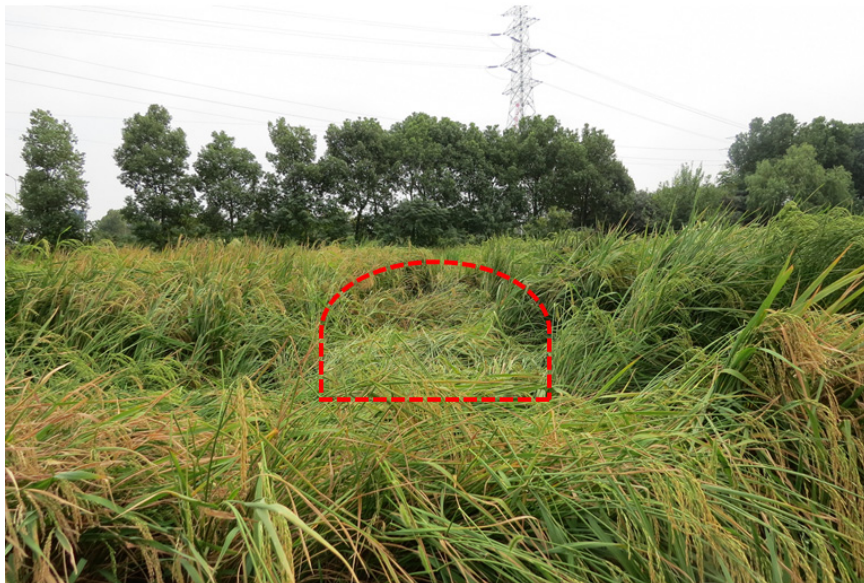

**Figure S12.** The scene of lodging in partial rice materials of natural population. The red dotted line represents the totally lodged materials among rice materials in natural population.

**Table S1.** Summary statistics for the 262 SSR markers used in the present study .

| Marker  | Chromosome | Position (cM) | Allele number | Gene diversity | Polymorphism information content |
|---------|------------|---------------|---------------|----------------|----------------------------------|
| RM84    | 1          | 18.8          | 7             | 0.41           | 0.39                             |
| RM283   | 1          | 19.9          | 8             | 0.84           | 0.81                             |
| RM3453  | 1          | 25.4          | 13            | 0.85           | 0.84                             |
| RM1     | 1          | 25.4          | 11            | 0.8            | 0.78                             |
| RM259   | 1          | 29.7          | 21            | 0.89           | 0.88                             |
| RM583   | 1          | 38.8          | 6             | 0.71           | 0.66                             |
| RM490   | 1          | 43.2          | 5             | 0.28           | 0.27                             |
| RM8095  | 1          | 51            | 9             | 0.83           | 0.8                              |
| RM140   | 1          | 60.6          | 7             | 0.26           | 0.25                             |
| RM562   | 1          | 65.4          | 21            | 0.92           | 0.92                             |
| RM9     | 1          | 78.4          | 16            | 0.81           | 0.79                             |
| RM129   | 1          | 92.4          | 5             | 0.3            | 0.29                             |
| RM5     | 1          | 93            | 9             | 0.83           | 0.81                             |
| RM1231  | 1          | 98.5          | 16            | 0.9            | 0.9                              |
| RM128   | 1          | 123.2         | 15            | 0.85           | 0.84                             |
| RM297   | 1          | 126.5         | 9             | 0.77           | 0.73                             |
| RM246   | 1          | 132           | 14            | 0.86           | 0.85                             |
| RM212   | 1          | 134.6         | 5             | 0.39           | 0.37                             |
| RM5389  | 1          | 135.8         | 13            | 0.86           | 0.85                             |
| RM486   | 1          | 142.4         | 9             | 0.72           | 0.68                             |
| RM265   | 1          | 153.5         | 8             | 0.73           | 0.69                             |
| RM3482  | 1          | 155.9         | 14            | 0.85           | 0.83                             |
| RM6831  | 1          | 157.6         | 8             | 0.77           | 0.73                             |
| RM14    | 1          | 181.8         | 14            | 0.89           | 0.88                             |
| RM1-003 | 1          | 194           | 12            | 0.82           | 0.8                              |
| RM5340  | 2          | 36.3          | 16            | 0.88           | 0.87                             |
| RM7288  | 2          | 42.4          | 23            | 0.9            | 0.89                             |
| RM5356  | 2          | 43.3          | 10            | 0.85           | 0.83                             |
| RM1358  | 2          | 48.1          | 10            | 0.82           | 0.79                             |
| RM1313  | 2          | 51.1          | 10            | 0.81           | 0.78                             |
| RM324   | 2          | 51.1          | 5             | 0.41           | 0.37                             |
| RM327   | 2          | 51.9          | 9             | 0.83           | 0.81                             |
| RM301   | 2          | 53.5          | 8             | 0.77           | 0.74                             |
| RM300   | 2          | 54.6          | 15            | 0.88           | 0.86                             |
| RM262   | 2          | 70.2          | 9             | 0.78           | 0.75                             |
| RM5427  | 2          | 84.6          | 11            | 0.68           | 0.64                             |
| RM3688  | 2          | 88.2          | 8             | 0.86           | 0.84                             |
| RM183   | 2          | 93.5          | 14            | 0.86           | 0.84                             |
| RM5804  | 2          | 98.2          | 8             | 0.77           | 0.73                             |

|        |   |       |    |      |      |
|--------|---|-------|----|------|------|
| RM106  | 2 | 101.5 | 16 | 0.9  | 0.89 |
| RM6361 | 2 | 102.9 | 8  | 0.74 | 0.7  |
| RM573  | 2 | 118.1 | 15 | 0.84 | 0.83 |
| RM450  | 2 | 122.8 | 7  | 0.81 | 0.79 |
| RM7598 | 2 | 126.4 | 7  | 0.56 | 0.53 |
| RM263  | 2 | 127.5 | 14 | 0.85 | 0.84 |
| RM112  | 2 | 137.5 | 9  | 0.63 | 0.6  |
| RM525  | 2 | 143.7 | 17 | 0.84 | 0.83 |
| RM213  | 2 | 150.5 | 11 | 0.84 | 0.83 |
| RM208  | 2 | 154.1 | 5  | 0.63 | 0.57 |
| RM3850 | 2 | 156.3 | 14 | 0.85 | 0.83 |
| RM498  | 2 | 156.3 | 13 | 0.81 | 0.79 |
| RM48   | 2 | 191.2 | 8  | 0.42 | 0.4  |
| RM266  | 2 | 192.2 | 10 | 0.75 | 0.72 |
| RM535  | 2 | 195.7 | 16 | 0.87 | 0.86 |
| RM132  | 3 | 3.9   | 5  | 0.4  | 0.38 |
| RM1332 | 3 | 11.5  | 4  | 0.68 | 0.62 |
| RM5849 | 3 | 18.4  | 15 | 0.82 | 0.79 |
| RM489  | 3 | 20.3  | 14 | 0.89 | 0.88 |
| RM545  | 3 | 24.7  | 5  | 0.59 | 0.52 |
| RM5480 | 3 | 25.9  | 10 | 0.62 | 0.58 |
| RM3467 | 3 | 28.2  | 14 | 0.89 | 0.88 |
| RM3766 | 3 | 34.8  | 10 | 0.72 | 0.69 |
| RM7    | 3 | 36.9  | 6  | 0.71 | 0.66 |
| RM5639 | 3 | 39.8  | 7  | 0.72 | 0.68 |
| RM7197 | 3 | 44.4  | 11 | 0.84 | 0.82 |
| RM7345 | 3 | 48.8  | 7  | 0.65 | 0.61 |
| RM282  | 3 | 55.8  | 11 | 0.84 | 0.82 |
| RM338  | 3 | 61.9  | 8  | 0.75 | 0.71 |
| RM218  | 3 | 67.8  | 9  | 0.71 | 0.67 |
| RM232  | 3 | 76.7  | 11 | 0.83 | 0.81 |
| RM7403 | 3 | 82.3  | 2  | 0.21 | 0.19 |
| RM6266 | 3 | 94.9  | 6  | 0.62 | 0.58 |
| RM7097 | 3 | 115.6 | 7  | 0.79 | 0.76 |
| RM135  | 3 | 120.4 | 9  | 0.77 | 0.74 |
| RM168  | 3 | 122.8 | 11 | 0.56 | 0.53 |
| RM186  | 3 | 127.4 | 7  | 0.78 | 0.74 |
| RM16   | 3 | 131.5 | 7  | 0.34 | 0.31 |
| RM5475 | 3 | 137.9 | 17 | 0.9  | 0.89 |
| RM416  | 3 | 140.1 | 9  | 0.72 | 0.68 |
| RM6712 | 3 | 158.2 | 12 | 0.77 | 0.74 |
| RM448  | 3 | 161.3 | 13 | 0.87 | 0.85 |
| RM148  | 3 | 191.6 | 8  | 0.74 | 0.7  |

|        |   |       |    |      |      |
|--------|---|-------|----|------|------|
| RM307  | 4 | 0     | 13 | 0.85 | 0.83 |
| RM335  | 4 | 5.4   | 16 | 0.84 | 0.83 |
| RM518  | 4 | 7.9   | 8  | 0.79 | 0.76 |
| RM3471 | 4 | 16.7  | 19 | 0.89 | 0.88 |
| RM4835 | 4 | 18.3  | 9  | 0.53 | 0.44 |
| RM5687 | 4 | 25.4  | 9  | 0.76 | 0.73 |
| RM6314 | 4 | 41.5  | 15 | 0.82 | 0.8  |
| RM471  | 4 | 53.8  | 9  | 0.8  | 0.78 |
| RM5951 | 4 | 56.1  | 5  | 0.69 | 0.64 |
| RM142  | 4 | 60.2  | 15 | 0.87 | 0.86 |
| RM6997 | 4 | 62.1  | 12 | 0.74 | 0.72 |
| RM7563 | 4 | 68.3  | 8  | 0.84 | 0.83 |
| RM6114 | 4 | 72    | 12 | 0.87 | 0.85 |
| RM6589 | 4 | 85.2  | 8  | 0.83 | 0.81 |
| RM317  | 4 | 96    | 6  | 0.71 | 0.66 |
| RM6089 | 4 | 97.7  | 12 | 0.83 | 0.81 |
| RM3513 | 4 | 99.6  | 7  | 0.53 | 0.49 |
| RM3836 | 4 | 108.2 | 11 | 0.83 | 0.82 |
| RM280  | 4 | 128.9 | 3  | 0.41 | 0.35 |
| RM559  | 4 | 129.6 | 6  | 0.71 | 0.67 |
| RM349  | 4 | 146.8 | 9  | 0.72 | 0.68 |
| RM348  | 4 | 160.8 | 5  | 0.5  | 0.44 |
| RM1182 | 5 | 3     | 11 | 0.85 | 0.83 |
| RM153  | 5 | 3     | 13 | 0.83 | 0.81 |
| RM122  | 5 | 3     | 6  | 0.25 | 0.23 |
| RM159  | 5 | 5.4   | 14 | 0.89 | 0.88 |
| RM267  | 5 | 25    | 12 | 0.85 | 0.84 |
| RM437  | 5 | 31.5  | 2  | 0.26 | 0.22 |
| RM3193 | 5 | 36.4  | 6  | 0.77 | 0.73 |
| RM574  | 5 | 41    | 7  | 0.75 | 0.72 |
| RM249  | 5 | 50.2  | 8  | 0.73 | 0.69 |
| RM6082 | 5 | 53.5  | 15 | 0.84 | 0.83 |
| RM598  | 5 | 62.7  | 6  | 0.52 | 0.48 |
| RM473B | 5 | 78.7  | 10 | 0.86 | 0.84 |
| RM164  | 5 | 91.4  | 8  | 0.66 | 0.62 |
| RM188  | 5 | 95.3  | 12 | 0.83 | 0.82 |
| RM161  | 5 | 96.9  | 18 | 0.9  | 0.9  |
| RM305  | 5 | 96.9  | 7  | 0.57 | 0.52 |
| RM3170 | 5 | 115.4 | 13 | 0.87 | 0.86 |
| RM480  | 5 | 130.6 | 17 | 0.88 | 0.87 |
| RM5818 | 5 | 144.9 | 11 | 0.84 | 0.82 |
| RM8109 | 6 | 1.7   | 10 | 0.77 | 0.74 |
| RM508  | 6 | 2.3   | 13 | 0.83 | 0.81 |



|        |   |       |    |      |      |
|--------|---|-------|----|------|------|
| RM510  | 6 | 11.5  | 11 | 0.83 | 0.81 |
| RM225  | 6 | 26.2  | 12 | 0.75 | 0.72 |
| RM405  | 6 | 28.6  | 6  | 0.73 | 0.69 |
| RM2126 | 6 | 32.7  | 11 | 0.71 | 0.66 |
| RM50   | 6 | 32.7  | 7  | 0.69 | 0.66 |
| RM276  | 6 | 33.5  | 12 | 0.86 | 0.85 |
| RM314  | 6 | 33.6  | 9  | 0.79 | 0.76 |
| RM136  | 6 | 53    | 18 | 0.86 | 0.85 |
| RM3330 | 6 | 61.6  | 14 | 0.89 | 0.88 |
| RM3187 | 6 | 73.2  | 6  | 0.68 | 0.63 |
| RM7579 | 6 | 84.5  | 6  | 0.74 | 0.69 |
| RM8239 | 6 | 91.9  | 5  | 0.74 | 0.7  |
| RM454  | 6 | 99.3  | 4  | 0.53 | 0.48 |
| RM7309 | 6 | 100.3 | 15 | 0.86 | 0.84 |
| RM528  | 6 | 100.8 | 11 | 0.74 | 0.7  |
| RM3138 | 6 | 110.6 | 12 | 0.83 | 0.81 |
| RM162  | 6 | 114.9 | 21 | 0.9  | 0.9  |
| RM6811 | 6 | 115.6 | 15 | 0.9  | 0.89 |
| RM345  | 6 | 123.9 | 7  | 0.6  | 0.55 |
| RM5753 | 6 | 124.4 | 20 | 0.86 | 0.85 |
| RM295  | 7 | 0     | 14 | 0.68 | 0.65 |
| RM125  | 7 | 24.8  | 4  | 0.57 | 0.47 |
| RM180  | 7 | 30.1  | 8  | 0.63 | 0.59 |
| RM542  | 7 | 34.7  | 7  | 0.8  | 0.77 |
| RM8263 | 7 | 35.7  | 8  | 0.67 | 0.62 |
| RM418  | 7 | 42.1  | 9  | 0.72 | 0.68 |
| RM346  | 7 | 47    | 9  | 0.77 | 0.74 |
| RM2530 | 7 | 53.4  | 15 | 0.88 | 0.87 |
| RM336  | 7 | 61    | 12 | 0.82 | 0.8  |
| RM5380 | 7 | 67    | 10 | 0.78 | 0.74 |
| RM6011 | 7 | 73.2  | 14 | 0.89 | 0.88 |
| RM505  | 7 | 78.6  | 9  | 0.82 | 0.79 |
| RM3589 | 7 | 89.8  | 13 | 0.82 | 0.8  |
| RM11   | 7 | 93.8  | 8  | 0.77 | 0.74 |
| RM234  | 7 | 93.9  | 14 | 0.8  | 0.78 |
| RM134  | 7 | 99.6  | 10 | 0.83 | 0.81 |
| RM1306 | 7 | 116.1 | 13 | 0.83 | 0.82 |
| RM82   | 7 | 128.9 | 4  | 0.3  | 0.29 |
| RM506  | 8 | 0     | 12 | 0.82 | 0.8  |
| RM1019 | 8 | 0.5   | 17 | 0.87 | 0.86 |
| RM152  | 8 | 9.4   | 13 | 0.8  | 0.78 |
| RM1235 | 8 | 12.8  | 5  | 0.6  | 0.53 |
| RM6863 | 8 | 16.4  | 11 | 0.79 | 0.76 |

|         |    |       |    |      |      |
|---------|----|-------|----|------|------|
| RM4085  | 8  | 35.7  | 12 | 0.86 | 0.85 |
| RM544   | 8  | 38.5  | 15 | 0.91 | 0.9  |
| RM8243  | 8  | 50.8  | 11 | 0.88 | 0.87 |
| RM25    | 8  | 52.2  | 12 | 0.78 | 0.75 |
| RM331   | 8  | 59    | 10 | 0.8  | 0.77 |
| RM72    | 8  | 60.9  | 14 | 0.81 | 0.79 |
| RM6215  | 8  | 66.8  | 11 | 0.78 | 0.76 |
| RM7556  | 8  | 86.7  | 12 | 0.84 | 0.82 |
| RM6976  | 8  | 92.2  | 19 | 0.89 | 0.88 |
| RM80    | 8  | 103.7 | 12 | 0.61 | 0.6  |
| RM502   | 8  | 109.3 | 15 | 0.86 | 0.85 |
| RM3754  | 8  | 112.6 | 7  | 0.81 | 0.79 |
| RM6948  | 8  | 114.4 | 7  | 0.71 | 0.68 |
| RM433   | 8  | 116   | 6  | 0.23 | 0.22 |
| RM281   | 8  | 128.1 | 14 | 0.83 | 0.81 |
| RM264   | 8  | 138.2 | 12 | 0.86 | 0.85 |
| RM1328  | 9  | 0     | 15 | 0.88 | 0.87 |
| RM8206  | 9  | 3.2   | 11 | 0.73 | 0.7  |
| RM524   | 9  | 42.5  | 13 | 0.85 | 0.83 |
| RM3912  | 9  | 46.3  | 9  | 0.85 | 0.83 |
| RM566   | 9  | 50.7  | 9  | 0.76 | 0.73 |
| RM434   | 9  | 57.7  | 9  | 0.86 | 0.85 |
| RM3600  | 9  | 62.7  | 12 | 0.8  | 0.77 |
| RM24481 | 9  | 63    | 19 | 0.9  | 0.9  |
| RM3533  | 9  | 65.1  | 14 | 0.83 | 0.81 |
| RM6570  | 9  | 68.2  | 9  | 0.53 | 0.5  |
| RM410   | 9  | 79.3  | 9  | 0.69 | 0.64 |
| RM257   | 9  | 79.7  | 11 | 0.77 | 0.74 |
| RM201   | 9  | 81.2  | 9  | 0.77 | 0.74 |
| OSR28   | 9  | 85.4  | 13 | 0.85 | 0.83 |
| RM5384  | 9  | 90.7  | 10 | 0.86 | 0.84 |
| RM1013  | 9  | 93.5  | 8  | 0.76 | 0.73 |
| RM7492  | 10 | 0     | 12 | 0.87 | 0.86 |
| RM7545  | 10 | 7.6   | 25 | 0.94 | 0.94 |
| RM6646  | 10 | 13.3  | 9  | 0.82 | 0.8  |
| RM244   | 10 | 15    | 6  | 0.48 | 0.45 |
| RM216   | 10 | 24.8  | 3  | 0.61 | 0.54 |
| RM311   | 10 | 25.2  | 8  | 0.8  | 0.78 |
| RM184   | 10 | 41.6  | 5  | 0.73 | 0.69 |
| RM1125  | 10 | 46.8  | 14 | 0.85 | 0.84 |
| RM258   | 10 | 48.8  | 8  | 0.68 | 0.62 |
| RM5629  | 10 | 53.6  | 11 | 0.77 | 0.75 |
| RM6100  | 10 | 53.9  | 5  | 0.32 | 0.29 |

|        |    |       |    |      |      |
|--------|----|-------|----|------|------|
| RM1108 | 10 | 55.3  | 6  | 0.29 | 0.27 |
| RM3773 | 10 | 58.9  | 16 | 0.89 | 0.88 |
| RM269  | 10 | 69.6  | 5  | 0.67 | 0.6  |
| RM5352 | 10 | 71.4  | 5  | 0.52 | 0.43 |
| RM304  | 10 | 73    | 6  | 0.13 | 0.13 |
| RM171  | 10 | 73    | 4  | 0.6  | 0.52 |
| RM6160 | 10 | 81    | 8  | 0.58 | 0.54 |
| RM590  | 10 | 83.3  | 9  | 0.8  | 0.77 |
| RM333  | 10 | 110.4 | 7  | 0.32 | 0.31 |
| RM286  | 11 | 0.1   | 8  | 0.69 | 0.65 |
| RM6327 | 11 | 1.7   | 15 | 0.88 | 0.87 |
| RM1240 | 11 | 6.5   | 15 | 0.85 | 0.84 |
| RM7557 | 11 | 9.2   | 5  | 0.58 | 0.53 |
| RM1812 | 11 | 10.3  | 10 | 0.59 | 0.53 |
| RM6544 | 11 | 19.8  | 5  | 0.46 | 0.42 |
| RM3133 | 11 | 32.7  | 5  | 0.7  | 0.64 |
| RM167  | 11 | 37.5  | 4  | 0.66 | 0.59 |
| RM3701 | 11 | 45.3  | 10 | 0.73 | 0.69 |
| RM7391 | 11 | 54.3  | 10 | 0.82 | 0.8  |
| RM7303 | 11 | 64.2  | 4  | 0.09 | 0.09 |
| RM7120 | 11 | 66.6  | 5  | 0.61 | 0.55 |
| RM287  | 11 | 68.6  | 8  | 0.74 | 0.71 |
| RM457  | 11 | 78.8  | 8  | 0.56 | 0.52 |
| RM5349 | 11 | 79.1  | 6  | 0.66 | 0.6  |
| RM209  | 11 | 84.7  | 6  | 0.4  | 0.37 |
| RM21   | 11 | 85.7  | 11 | 0.77 | 0.73 |
| RM7170 | 11 | 101.9 | 12 | 0.87 | 0.85 |
| RM206  | 11 | 102.9 | 14 | 0.85 | 0.84 |
| RM7163 | 11 | 112.4 | 2  | 0.08 | 0.08 |
| RM6293 | 11 | 117.3 | 6  | 0.66 | 0.59 |
| RM224  | 11 | 120.1 | 13 | 0.89 | 0.88 |
| RM20   | 12 | 3.2   | 13 | 0.81 | 0.78 |
| RM19   | 12 | 20.9  | 15 | 0.86 | 0.84 |
| RM247  | 12 | 26.7  | 11 | 0.81 | 0.78 |
| RM6296 | 12 | 26.7  | 5  | 0.56 | 0.52 |
| RM7619 | 12 | 38.1  | 3  | 0.48 | 0.4  |
| RM512  | 12 | 39.4  | 5  | 0.28 | 0.26 |
| RM5746 | 12 | 39.4  | 16 | 0.86 | 0.85 |
| RM277  | 12 | 48.2  | 3  | 0.4  | 0.33 |
| RM1337 | 12 | 51.5  | 8  | 0.68 | 0.63 |
| RM511  | 12 | 59.8  | 9  | 0.82 | 0.8  |
| RM1246 | 12 | 65.3  | 10 | 0.68 | 0.65 |
| RM7102 | 12 | 71.8  | 10 | 0.76 | 0.73 |

|                         |    |       |       |        |        |
|-------------------------|----|-------|-------|--------|--------|
| RM309                   | 12 | 73    | 10    | 0.82   | 0.79   |
| RM463                   | 12 | 75.5  | 7     | 0.45   | 0.43   |
| RM6869                  | 12 | 75.8  | 15    | 0.87   | 0.86   |
| RM3331                  | 12 | 89.5  | 8     | 0.72   | 0.67   |
| RM270                   | 12 | 91.3  | 9     | 0.73   | 0.69   |
| RM5479                  | 12 | 95.4  | 16    | 0.72   | 0.7    |
| RM17                    | 12 | 107.4 | 11    | 0.85   | 0.83   |
| RM12                    | 12 | 107.4 | 4     | 0.54   | 0.45   |
| <b>Total</b>            |    |       | 2664  | 190.62 | 183.23 |
| <b>Mean<sup>a</sup></b> |    |       | 10.17 | 0.73   | 0.7    |

---

<sup>a</sup> computed by.

**Table S2.** The code, name and origin of 504 rice accessions divided into 8 sub populations corresponding to the probability value (Q value).

| Code   | Chinese name | Accession          | Origin            | Q values |    |       |       |    |       |       |    | POP       |
|--------|--------------|--------------------|-------------------|----------|----|-------|-------|----|-------|-------|----|-----------|
|        |              |                    |                   | Q1       | Q2 | Q3    | Q4    | Q5 | Q6    | Q7    | Q8 |           |
| H18001 | 红芒沙粳         | Hongmangzaodao     | Kunshan, Jiangsu  | 0.001    | 0  | 0.001 | 0     | 0  | 0.088 | 0.909 | 0  | Sub-pop 7 |
| H18002 | 晚黄稻          | Wanhuangdao        | Wuxian, Jiangsu   | 0        | 0  | 0     | 0     | 0  | 0     | 0.999 | 0  | Sub-pop 7 |
| H18003 | 果子糯          | Guozinuo           | Kunshan, Jiangsu  | 0        | 0  | 0     | 0     | 0  | 0     | 0.999 | 0  | Sub-pop 7 |
| H18004 | 水晶白稻         | Shuijingbaidao     | Wuxian, Jiangsu   | 0        | 0  | 0     | 0     | 0  | 0     | 0.999 | 0  | Sub-pop 7 |
| H18005 | 无芒早稻         | Wumangzaodao       | Changshu, Jiangsu | 0        | 0  | 0     | 0     | 0  | 0     | 0.999 | 0  | Sub-pop 7 |
| H18006 | 三百粒头         | Sanbailitou        | Kunshan, Jiangsu  | 0        | 0  | 0     | 0     | 0  | 0     | 0.999 | 0  | Sub-pop 7 |
| H18007 | 粗莠晚洋稻        | Cuyingwanyangdao   | Wuxi, Jiangsu     | 0        | 0  | 0     | 0     | 0  | 0     | 0.999 | 0  | Sub-pop 7 |
| H18008 | 洋铃稻          | Yanglingdao        | Wuxi, Jiangsu     | 0        | 0  | 0     | 0     | 0  | 0     | 0.999 | 0  | Sub-pop 7 |
| H18009 | 敲冰黄          | Qiaobinghuang      | Taicang, Jiangsu  | 0        | 0  | 0     | 0     | 0  | 0     | 0.999 | 0  | Sub-pop 7 |
| H18010 | 铁粳青          | Tiejingqing        | Kunshan, Jiangsu  | 0        | 0  | 0     | 0     | 0  | 0     | 0.999 | 0  | Sub-pop 7 |
| H18011 | 小白野稻         | Xiaobaiyedao       | Wuxi, Jiangsu     | 0        | 0  | 0     | 0     | 0  | 0     | 0.999 | 0  | Sub-pop 7 |
| H18012 | 抱芯太湖青        | Baoxintaihuqing    | Wujiang, Jiangsu  | 0.005    | 0  | 0     | 0.001 | 0  | 0.005 | 0.988 | 0  | Sub-pop 7 |
| H18013 | 江丰 4 号       | Jiangfeng4         | Jiangyin, Jiangsu | 0        | 0  | 0     | 0     | 0  | 0     | 0.999 | 0  | Sub-pop 7 |
| H18014 | 苏粳 4 号       | Sujing4            | Suzhou, Jiangsu   | 0        | 0  | 0     | 0     | 0  | 0     | 0.999 | 0  | Sub-pop 7 |
| H18015 | 矮种罗汉黄        | Aizhongluohanhuang | Changshu, Jiangsu | 0        | 0  | 0     | 0     | 0  | 0     | 1     | 0  | Sub-pop 7 |
| H18016 | 薄稻           | Baodao             | Wuxi, Jiangsu     | 0        | 0  | 0     | 0     | 0  | 0     | 1     | 0  | Sub-pop 7 |
| H18017 | 晚木樨球         | Wanmuxiqiu         | Taicang, Jiangsu  | 0        | 0  | 0     | 0     | 0  | 0     | 1     | 0  | Sub-pop 7 |

|        |       |                  |                   |   |   |   |   |   |   |       |   |           |
|--------|-------|------------------|-------------------|---|---|---|---|---|---|-------|---|-----------|
| H18018 | 荒三石   | Huangsanshi      | Wujiang, Jiangsu  | 0 | 0 | 0 | 0 | 0 | 0 | 1     | 0 | Sub-pop 7 |
| H18019 | 二黑稻   | Erheidao         | Wuxi, Jiangsu     | 0 | 0 | 0 | 0 | 0 | 0 | 1     | 0 | Sub-pop 7 |
| H18020 | 小青种   | Xiaoqingzhong    | Wuxian, Jiangsu   | 0 | 0 | 0 | 0 | 0 | 0 | 1     | 0 | Sub-pop 7 |
| H18021 | 早光头   | Zaoguangtou      | Wuxi, Jiangsu     | 0 | 0 | 0 | 0 | 0 | 0 | 1     | 0 | Sub-pop 7 |
| H18022 | 小罗汉黄  | Xiaoluohanhuang  | Changshu, Jiangsu | 0 | 0 | 0 | 0 | 0 | 0 | 1     | 0 | Sub-pop 7 |
| H18023 | 苏州青   | Souzhouqing      | Jiangyin, Jiangsu | 0 | 0 | 0 | 0 | 0 | 0 | 1     | 0 | Sub-pop 7 |
| H18024 | 晚芦粟   | Wanluli          | Jiangyin, Jiangsu | 0 | 0 | 0 | 0 | 0 | 0 | 0.999 | 0 | Sub-pop 7 |
| H18025 | 晚八果   | Wanbaguo         | Jiangyin, Jiangsu | 0 | 0 | 0 | 0 | 0 | 0 | 1     | 0 | Sub-pop 7 |
| H18026 | 老叠谷   | Laodiegu         | Wujiang, Jiangsu  | 0 | 0 | 0 | 0 | 0 | 0 | 0.999 | 0 | Sub-pop 7 |
| H18027 | 野凤凰   | Yefenghuang      | Wujiang, Jiangsu  | 0 | 0 | 0 | 0 | 0 | 0 | 1     | 0 | Sub-pop 7 |
| H18028 | 早黑头红  | Zaoheitouhong    | Wujiang, Jiangsu  | 0 | 0 | 0 | 0 | 0 | 0 | 1     | 0 | Sub-pop 7 |
| H18029 | 罗汉黄   | Luohanhuang      | Jiangyin, Jiangsu | 0 | 0 | 0 | 0 | 0 | 0 | 1     | 0 | Sub-pop 7 |
| H18030 | 龙沟种   | Longgouzhong     | Qingpu, Shanghai  | 0 | 0 | 0 | 0 | 0 | 0 | 1     | 0 | Sub-pop 7 |
| H18031 | 石芦青   | Shiluqing        | Kunshan, Jiangsu  | 0 | 0 | 0 | 0 | 0 | 0 | 1     | 0 | Sub-pop 7 |
| H18032 | 立更青   | Ligengqing       | Yixing, Jiangsu   | 0 | 0 | 0 | 0 | 0 | 0 | 1     | 0 | Sub-pop 7 |
| H18033 | 早黑头红  | Heitouhong       | Wujiang, Jiangsu  | 0 | 0 | 0 | 0 | 0 | 0 | 1     | 0 | Sub-pop 7 |
| H18034 | 老来红   | Laolaihong       | Wuxian, Jiangsu   | 0 | 0 | 0 | 0 | 0 | 0 | 1     | 0 | Sub-pop 7 |
| H18035 | 二粒瘪   | Erlibie          | Wuxian, Jiangsu   | 0 | 0 | 0 | 0 | 0 | 0 | 0.999 | 0 | Sub-pop 7 |
| H18036 | 金谷黄   | Jinguhuang       | Wujiang, Jiangsu  | 0 | 0 | 0 | 0 | 0 | 0 | 0.999 | 0 | Sub-pop 7 |
| H18037 | 早十日黄稻 | Zaoshirihuangdao | Wuxian, Jiangsu   | 0 | 0 | 0 | 0 | 0 | 0 | 0.999 | 0 | Sub-pop 7 |

[illegible]

[illegible]



|        |                |              |                      |   |       |   |   |       |   |       |       |           |
|--------|----------------|--------------|----------------------|---|-------|---|---|-------|---|-------|-------|-----------|
| H18078 | 徐稻 5 号         | Xudao5       | Xuzhou, Jiangsu      | 0 | 0     | 0 | 0 | 0     | 0 | 0     | 1     | Sub-pop 8 |
| H18079 | 淮稻 9 号         | Huaidao9     | Huaian, Jiangsu      | 0 | 0     | 0 | 0 | 0     | 0 | 0     | 0.999 | Sub-pop 8 |
| H18080 | 盐稻 6 号         | Yandao6      | Yancheng, Jiangsu    | 0 | 0     | 0 | 0 | 0     | 0 | 0     | 1     | Sub-pop 8 |
| H18081 | 阳光 200         | Yangguang200 | Lianyungang, Jiangsu | 0 | 0     | 0 | 0 | 0     | 0 | 0     | 0.999 | Sub-pop 8 |
| H18082 | 连粳 2 号         | Lianjing2    | Lianyungang, Jiangsu | 0 | 0     | 0 | 0 | 0     | 0 | 0     | 0.999 | Sub-pop 8 |
| H18083 | 秀水 79 (丙 8979) | Xiushui79    | Jiaxing, Zhejiang    | 0 | 0     | 0 | 0 | 0     | 0 | 0     | 0.999 | Sub-pop 8 |
| H18084 | C 堡            | Cbao         | Hefei, Anhui         | 0 | 0     | 0 | 0 | 0     | 0 | 0     | 1     | Sub-pop 8 |
| H18085 | 日本晴            | Nipponbare   | Japan                | 0 | 0     | 0 | 0 | 0     | 0 | 0     | 0.999 | Sub-pop 8 |
| H18086 | 镇 9424         | Zhen9424     | Zhenjiang, Jiangsu   | 0 | 0     | 0 | 0 | 0     | 0 | 0     | 1     | Sub-pop 8 |
| H18087 | 武育粳 7 号        | Wuyujing7    | Wujin, Jiangsu       | 0 | 0     | 0 | 0 | 0     | 0 | 0     | 0.999 | Sub-pop 8 |
| H18088 | 盐粳 8 号         | Yanjing8     | Yancheng, Jiangsu    | 0 | 0     | 0 | 0 | 0     | 0 | 0     | 0.999 | Sub-pop 8 |
| H18089 | 郑稻 18          | Zhengdao18   | Zhenzhou, Henan      | 0 | 0     | 0 | 0 | 0     | 0 | 0     | 0.999 | Sub-pop 8 |
| H18090 | 淮稻 11 号        | Huaidao11    | Huaian, Jiangsu      | 0 | 0.001 | 0 | 0 | 0     | 0 | 0.06  | 0.938 | Sub-pop 8 |
| H18091 | 圣稻 808         | Shengdao808  | Jiaxiang, Shandong   | 0 | 0.002 | 0 | 0 | 0     | 0 | 0.009 | 0.989 | Sub-pop 8 |
| H18092 | 圣稻 14          | Shengdao14   | Jiaxiang, Shandong   | 1 | 0     | 0 | 0 | 0     | 0 | 0     | 0     | Admix     |
| H18093 | 豫粳 6 号         | Yujing6      | Zhenzhou, Henan      | 0 | 0.001 | 0 | 0 | 0.261 | 0 | 0     | 0.738 | Admix     |
| H18094 | 淮稻 8 号         | Huaidao8     | Huaian, Jiangsu      | 0 | 0.721 | 0 | 0 | 0.278 | 0 | 0     | 0     | Admix     |

|        |          |                |                     |   |       |   |   |   |   |   |   |           |
|--------|----------|----------------|---------------------|---|-------|---|---|---|---|---|---|-----------|
| H18095 | 津稻 12    | Jindao12       | Dongli, Tianjin     | 0 | 0.999 | 0 | 0 | 0 | 0 | 0 | 0 | Sub-pop 2 |
| H18096 | 皖稻 68    | Wandao68       | Hefei, Anhui        | 0 | 0.999 | 0 | 0 | 0 | 0 | 0 | 0 | Sub-pop 2 |
| H18097 | 宿粳 353   | Sujing353      | Suzhou, Jiangsu     | 0 | 0.999 | 0 | 0 | 0 | 0 | 0 | 0 | Sub-pop 2 |
| H18098 | 香粳 9407  | Xiangjing9407  | Nanjing, Jiangsu    | 0 | 0.999 | 0 | 0 | 0 | 0 | 0 | 0 | Sub-pop 2 |
| H18099 | 中粳 212   | Zhongjing212   | Nanjing, Jiangsu    | 0 | 0.999 | 0 | 0 | 0 | 0 | 0 | 0 | Sub-pop 2 |
| H18100 | 中粳 9677  | Zhongjing9677  | Nanjing, Jiangsu    | 0 | 0.999 | 0 | 0 | 0 | 0 | 0 | 0 | Sub-pop 2 |
| H18101 | 中粳 131   | Zhongjing131   | Nanjing, Jiangsu    | 0 | 0.999 | 0 | 0 | 0 | 0 | 0 | 0 | Sub-pop 2 |
| H18102 | 中粳 438   | Zhongjing438   | Nanjing, Jiangsu    | 0 | 0.999 | 0 | 0 | 0 | 0 | 0 | 0 | Sub-pop 2 |
| H18103 | 盐粳 9 号   | Yanjing9       | Yancheng, Jiangsu   | 0 | 0.999 | 0 | 0 | 0 | 0 | 0 | 0 | Sub-pop 2 |
| H18104 | 扬辐粳 4901 | Yangfujing4901 | Yangzhou, Jiangsu   | 0 | 0.999 | 0 | 0 | 0 | 0 | 0 | 0 | Sub-pop 2 |
| H18105 | 紫粳       | Zijing         | Nanjing, Jiangsu    | 0 | 0.999 | 0 | 0 | 0 | 0 | 0 | 0 | Sub-pop 2 |
| H18106 | 镇稻 10 号  | Zhendao10      | Zhenjiang, Jiangsu  | 0 | 0.999 | 0 | 0 | 0 | 0 | 0 | 0 | Sub-pop 2 |
| H18107 | 郑旱 2 号   | Zhenghan2      | Zhengzhou,<br>Henan | 0 | 0.999 | 0 | 0 | 0 | 0 | 0 | 0 | Sub-pop 2 |
| H18108 | 郑旱 6 号   | Zhen6          | Zhengzhou,<br>Henan | 0 | 0.999 | 0 | 0 | 0 | 0 | 0 | 0 | Sub-pop 2 |
| H18109 | 西石黄      | Xishihuang     | Wuxian, Jiangsu     | 0 | 0.999 | 0 | 0 | 0 | 0 | 0 | 0 | Sub-pop 2 |
| H18110 | 大量稻      | Daliangdao     | Wuxi, Jiangsu       | 0 | 0.999 | 0 | 0 | 0 | 0 | 0 | 0 | Sub-pop 2 |
| H18111 | 黑嘴稻      | Heizuidao      | Changshu, Jiangsu   | 0 | 1     | 0 | 0 | 0 | 0 | 0 | 0 | Sub-pop 2 |
| H18112 | 小黄稻      | Xiaohuangdao   | Wuxian, Jiangsu     | 0 | 0.999 | 0 | 0 | 0 | 0 | 0 | 0 | Sub-pop 2 |
| H18113 | 凤凰稻      | Fenghaungdao   | Changshu, Jiangsu   | 0 | 0.999 | 0 | 0 | 0 | 0 | 0 | 0 | Sub-pop 2 |

|        |       |                     |                        |   |       |   |   |   |   |   |   |           |
|--------|-------|---------------------|------------------------|---|-------|---|---|---|---|---|---|-----------|
| H18114 | 麦节青   | Maijieqing          | Songjiang,<br>Shanghai | 0 | 0.999 | 0 | 0 | 0 | 0 | 0 | 0 | Sub-pop 2 |
| H18115 | 鸡粳稻   | Jijingdao           | Wujiang, Jiangsu       | 0 | 0.999 | 0 | 0 | 0 | 0 | 0 | 0 | Sub-pop 2 |
| H18116 | 中熟洋种稻 | Zhognsuyangzhogndao | Wuxi, Jiangsu          | 0 | 0.999 | 0 | 0 | 0 | 0 | 0 | 0 | Sub-pop 2 |
| H18117 | 堆谷种   | Duiguzhong          | Wujiang, Jiangsu       | 0 | 0.999 | 0 | 0 | 0 | 0 | 0 | 0 | Sub-pop 2 |
| H18118 | 甩杀板   | Shuaishaban         | Songjiang,<br>Shanghai | 0 | 0.999 | 0 | 0 | 0 | 0 | 0 | 0 | Sub-pop 2 |
| H18119 | 牛毛黄   | Niumaohuang         | Taicang, Jiangsu       | 0 | 1     | 0 | 0 | 0 | 0 | 0 | 0 | Sub-pop 2 |
| H18120 | 晚黑头红  | Wanheitouhong       | Wujiang, Jiangsu       | 0 | 0.999 | 0 | 0 | 0 | 0 | 0 | 0 | Sub-pop 2 |
| H18121 | 太湖青   | Taihuqing           | Kunshan, Jiangsu       | 0 | 0.999 | 0 | 0 | 0 | 0 | 0 | 0 | Sub-pop 2 |
| H18122 | 一粒芒   | Yilimang            | Changshu, Jiangsu      | 0 | 0.999 | 0 | 0 | 0 | 0 | 0 | 0 | Sub-pop 2 |
| H18123 | 五齐头   | Wuqitou             | Wujin, Jiangsu         | 0 | 0.999 | 0 | 0 | 0 | 0 | 0 | 0 | Sub-pop 2 |
| H18124 | 脚矮黑头红 | Jiaoaiheitouhong    | Wujiang, Jiangsu       | 0 | 0.999 | 0 | 0 | 0 | 0 | 0 | 0 | Sub-pop 2 |
| H18125 | 老勿死   | Laowusi             | Wujiang, Jiangsu       | 0 | 0.999 | 0 | 0 | 0 | 0 | 0 | 0 | Sub-pop 2 |
| H18126 | 慢绿种   | Manliuzhong         | Jinshan, Shanghai      | 0 | 0.999 | 0 | 0 | 0 | 0 | 0 | 0 | Sub-pop 2 |
| H18127 | 天落黄   | Tainluohuang        | Changshu, Jiangsu      | 0 | 1     | 0 | 0 | 0 | 0 | 0 | 0 | Sub-pop 2 |
| H18128 | 韭菜青   | Jiucaiqing          | Changshu, Jiangsu      | 0 | 0.999 | 0 | 0 | 0 | 0 | 0 | 0 | Sub-pop 2 |
| H18129 | 矮箕大绿种 | Aiqidaliuzhong      | Jiading, Shanghai      | 0 | 0.999 | 0 | 0 | 0 | 0 | 0 | 0 | Sub-pop 2 |
| H18130 | 芦粳青   | Lujingqing          | Wujiang, Jiangsu       | 0 | 0.999 | 0 | 0 | 0 | 0 | 0 | 0 | Sub-pop 2 |
| H18131 | 高粱青   | Gaoliangqing        | Wujiang, Jiangsu       | 0 | 0.999 | 0 | 0 | 0 | 0 | 0 | 0 | Sub-pop 2 |
| H18132 | 一时兴   | Yishixing           | Changshu, Jiangsu      | 0 | 0.999 | 0 | 0 | 0 | 0 | 0 | 0 | Sub-pop 2 |

|        |       |                   |                   |   |       |       |   |   |       |   |   |           |
|--------|-------|-------------------|-------------------|---|-------|-------|---|---|-------|---|---|-----------|
| H18133 | 黑种    | Heizhong          | Wuxian, Jiangsu   | 0 | 0.999 | 0     | 0 | 0 | 0     | 0 | 0 | Sub-pop 2 |
| H18134 | 雪里青   | Xueliqing         | Wuxi, Jiangsu     | 0 | 0.999 | 0     | 0 | 0 | 0     | 0 | 0 | Sub-pop 2 |
| H18135 | 溧阳小红稻 | Liyangxiaohongdao | Liyang, Jiangsu   | 0 | 0.999 | 0     | 0 | 0 | 0     | 0 | 0 | Sub-pop 2 |
| H18136 | 菊花黄   | Juhuahuang        | Wuxi, Jiangsu     | 0 | 0.999 | 0     | 0 | 0 | 0     | 0 | 0 | Sub-pop 2 |
| H18137 | 长子粳野稻 | Changzijingyedao  | Wuxian, Jiangsu   | 0 | 0.999 | 0     | 0 | 0 | 0     | 0 | 0 | Sub-pop 2 |
| H18138 | 盖稻青   | Gaidaoqing        | Wujiang, Jiangsu  | 0 | 0.999 | 0     | 0 | 0 | 0     | 0 | 0 | Sub-pop 2 |
| H18139 | 丁庄稻   | Dingzhuangdao     | Wuxi, Jiangsu     | 0 | 0.999 | 0     | 0 | 0 | 0     | 0 | 0 | Sub-pop 2 |
| H18140 | 学堂种   | Xuetangzhong      | Jiangyin, Jiangsu | 0 | 0.999 | 0     | 0 | 0 | 0     | 0 | 0 | Sub-pop 2 |
| H18141 | 攒百担   | Guanbaidan        | Wujiang, Jiangsu  | 0 | 0     | 0.999 | 0 | 0 | 0     | 0 | 0 | Sub-pop 3 |
| H18142 | 红薄稻   | Hongbaodao        | Jiaxing, Zhejiang | 0 | 0     | 0.999 | 0 | 0 | 0     | 0 | 0 | Sub-pop 3 |
| H18143 | 铁秆稻   | Tiegandao         | Wujiang, Jiangsu  | 0 | 0     | 0.999 | 0 | 0 | 0     | 0 | 0 | Sub-pop 3 |
| H18144 | 聚子光   | Juzigaung         | Wuxi, Jiangsu     | 0 | 0     | 0.999 | 0 | 0 | 0     | 0 | 0 | Sub-pop 3 |
| H18145 | 野白稻   | Yebaidao          | Taicang, Jiangsu  | 0 | 0     | 0.999 | 0 | 0 | 0     | 0 | 0 | Sub-pop 3 |
| H18146 | 大黑头红  | Daheitouhong      | Wujiang, Jiangsu  | 0 | 0     | 0.999 | 0 | 0 | 0     | 0 | 0 | Sub-pop 3 |
| H18147 | 百歌稻   | Baigedao          | Wuxian, Jiangsu   | 0 | 0     | 0.857 | 0 | 0 | 0.142 | 0 | 0 | Admix     |
| H18148 | 叠叠种   | Diediezhong       | Qingpu, Shanghai  | 0 | 0     | 0.999 | 0 | 0 | 0     | 0 | 0 | Sub-pop 3 |
| H18149 | 浦西大稻头 | Puxidadaotou      | Wujiang, Jiangsu  | 0 | 0     | 0.999 | 0 | 0 | 0     | 0 | 0 | Sub-pop 3 |
| H18150 | 洋稻    | Yangdao           | Wujiang, Jiangsu  | 0 | 0     | 0.999 | 0 | 0 | 0     | 0 | 0 | Sub-pop 3 |
| H18151 | 晏红稻   | Yanhongdao        | Wujiang, Jiangsu  | 0 | 0     | 0.999 | 0 | 0 | 0     | 0 | 0 | Sub-pop 3 |
| H18152 | 白壳晚稻  | Baikewandao       | Wuxi, Jiangsu     | 0 | 0     | 0.999 | 0 | 0 | 0     | 0 | 0 | Sub-pop 3 |

|        |         |                 |                   |   |       |       |      |   |       |   |   |           |
|--------|---------|-----------------|-------------------|---|-------|-------|------|---|-------|---|---|-----------|
| H18153 | 爱国大稻头   | Aiguodadaotou   | Wujiang, Jiangsu  | 0 | 0     | 0.96  | 0    | 0 | 0.039 | 0 | 0 | Sub-pop 3 |
| H18154 | 四石头     | Sishitou        | Wuxian, Jiangsu   | 0 | 0.001 | 0.999 | 0    | 0 | 0     | 0 | 0 | Sub-pop 3 |
| H18155 | 千斤稻     | Qianjindao      | Wujiang, Jiangsu  | 0 | 0     | 0.999 | 0    | 0 | 0     | 0 | 0 | Sub-pop 3 |
| H18156 | 柏树青     | Baishuqing      | Qingpu, Shanghai  | 0 | 0     | 0.999 | 0    | 0 | 0     | 0 | 0 | Sub-pop 3 |
| H18157 | 嘉 45    | Jia45           | Jiaxing, Zhejiang | 0 | 0     | 0.57  | 0.43 | 0 | 0     | 0 | 0 | Admix     |
| H18158 | 秋田大泻稻   | Qiutiandaxiedao | Wujiang, Jiangsu  | 0 | 0     | 0.999 | 0    | 0 | 0     | 0 | 0 | Sub-pop 3 |
| H18159 | 琦玉糯 10  | Qiyunuo10       | Wujiang, Jiangsu  | 0 | 0     | 0.999 | 0    | 0 | 0     | 0 | 0 | Sub-pop 3 |
| H18160 | 吴糯一号    | Wunuo1          | Wujiang, Jiangsu  | 0 | 0     | 0.999 | 0    | 0 | 0     | 0 | 0 | Sub-pop 3 |
| H18161 | 加农糯 2 号 | Jianongnuo2     | Wujiang, Jiangsu  | 0 | 0     | 0.999 | 0    | 0 | 0     | 0 | 0 | Sub-pop 3 |
| H18162 | 红农 5 号  | Hongnong5       | Wujiang, Jiangsu  | 0 | 0     | 0.999 | 0    | 0 | 0     | 0 | 0 | Sub-pop 3 |
| H18163 | 农林糯 4 号 | Nonglinnuo4     | Wujiang, Jiangsu  | 0 | 0     | 0.999 | 0    | 0 | 0     | 0 | 0 | Sub-pop 3 |
| H18164 | 香糯稻     | Xiangnuodao     | Wuxian, Jiangsu   | 0 | 0     | 0.999 | 0    | 0 | 0     | 0 | 0 | Sub-pop 3 |
| H18165 | 芦柴红     | Luchaihong      | Wujiang, Jiangsu  | 0 | 0     | 0.999 | 0    | 0 | 0     | 0 | 0 | Sub-pop 3 |
| H18166 | 寸谷      | Cungu           | Wujiang, Jiangsu  | 0 | 0     | 0.999 | 0    | 0 | 0     | 0 | 0 | Sub-pop 3 |
| H18167 | 卡特纳     | Katena          | Wujiang, Jiangsu  | 0 | 0     | 0.999 | 0    | 0 | 0     | 0 | 0 | Sub-pop 3 |
| H18168 | 攢刹糯     | Guanchanuo      | Wujiang, Jiangsu  | 0 | 0     | 0.999 | 0    | 0 | 0     | 0 | 0 | Sub-pop 3 |
| H18169 | 葵花糯     | Kuihuanuo       | Wuxian, Jiangsu   | 0 | 0     | 0.999 | 0    | 0 | 0     | 0 | 0 | Sub-pop 3 |
| H18170 | 苏御糯     | Suyunuo         | Wuxian, Jiangsu   | 0 | 0     | 0.999 | 0    | 0 | 0     | 0 | 0 | Sub-pop 3 |
| H18171 | 红脚占     | Hongjiaozhan    | Wuxian, Jiangsu   | 0 | 0     | 0.999 | 0    | 0 | 0     | 0 | 0 | Sub-pop 3 |
| H18172 | 毫补卡     | Haobuka         | Wuxian, Jiangsu   | 0 | 0     | 0.999 | 0    | 0 | 0     | 0 | 0 | Sub-pop 3 |

|        |        |                  |                   |       |   |       |   |   |       |       |   |           |
|--------|--------|------------------|-------------------|-------|---|-------|---|---|-------|-------|---|-----------|
| H18173 | 出阳旱 32 | Chuyanghan32     | Wuxian, Jiangsu   | 0     | 0 | 0.999 | 0 | 0 | 0     | 0     | 0 | Sub-pop 3 |
| H18174 | 利班一号   | Libanyi          | Wuxian, Jiangsu   | 0     | 0 | 0.999 | 0 | 0 | 0     | 0     | 0 | Sub-pop 3 |
| H18175 | 昆农 8 号 | Kunnong8         | Kunshan, Jiangsu  | 0     | 0 | 0.999 | 0 | 0 | 0     | 0     | 0 | Sub-pop 3 |
| H18176 | 桂花黄    | Guihuahuang      | Nanjing, Jiangsu  | 0     | 0 | 0.988 | 0 | 0 | 0.011 | 0     | 0 | Sub-pop 3 |
| H18177 | 周家种    | Zhoujiazong      | Wujiang, Jiangsu  | 0     | 0 | 0.999 | 0 | 0 | 0     | 0     | 0 | Sub-pop 3 |
| H18178 | 小凤凰    | Xiaofenghuang    | Wuxian, Jiangsu   | 0     | 0 | 0.999 | 0 | 0 | 0     | 0     | 0 | Sub-pop 3 |
| H18179 | 香粳稻    | Xiangjingdao     | Wuxian, Jiangsu   | 0     | 0 | 0.971 | 0 | 0 | 0.028 | 0     | 0 | Sub-pop 3 |
| H18180 | 灰藻     | Huizao           | Wujiang, Jiangsu  | 0     | 0 | 0.999 | 0 | 0 | 0     | 0     | 0 | Sub-pop 3 |
| H18181 | 硬头稻    | Yingtoudao       | Kunshan, Jiangsu  | 0.001 | 0 | 0.927 | 0 | 0 | 0.071 | 0     | 0 | Sub-pop 3 |
| H18182 | 长稻头    | Changdaotou      | Wujiang, Jiangsu  | 0     | 0 | 0.892 | 0 | 0 | 0.106 | 0.001 | 0 | Admix     |
| H18183 | 杨庙种    | Yangmiaozhong    | Wujiang, Jiangsu  | 0     | 0 | 0.915 | 0 | 0 | 0.084 | 0     | 0 | Sub-pop 3 |
| H18184 | 毛光稻    | Maoguangdao      | Wuxian, Jiangsu   | 0     | 0 | 0.943 | 0 | 0 | 0.056 | 0     | 0 | Sub-pop 3 |
| H18185 | 大种稻    | Dazhongdao       | Wujiang, Jiangsu  | 0     | 0 | 0.999 | 0 | 0 | 0     | 0     | 0 | Sub-pop 3 |
| H18186 | 三吓稻    | Sanxiadao        | Wuxi, Jiangsu     | 0     | 0 | 0.999 | 0 | 0 | 0     | 0     | 0 | Sub-pop 3 |
| H18187 | 小青芒    | Xiaoqingmang     | Changshu, Jiangsu | 0     | 0 | 0.999 | 0 | 0 | 0     | 0     | 0 | Sub-pop 3 |
| H18188 | 红秆荔枝红  | Hongganlizhihong | Wujiang, Jiangsu  | 0     | 0 | 0.999 | 0 | 0 | 0     | 0     | 0 | Sub-pop 3 |
| H18189 | 无锡稻    | Wuxidao          | Changshu, Jiangsu | 0     | 0 | 0.999 | 0 | 0 | 0     | 0     | 0 | Sub-pop 3 |
| H18190 | 晚中秋    | Wanzhognqiu      | Wuxian, Jiangsu   | 0     | 0 | 0.999 | 0 | 0 | 0     | 0     | 0 | Sub-pop 3 |
| H18191 | 风景稻    | Fengjingdao      | Wuxian, Jiangsu   | 0     | 0 | 0.999 | 0 | 0 | 0     | 0     | 0 | Sub-pop 3 |
| H18192 | 绿种     | Liuzhong         | Changshu, Jiangsu | 0     | 0 | 0.999 | 0 | 0 | 0     | 0     | 0 | Sub-pop 3 |

|        |       |                  |                        |   |   |       |   |   |       |   |   |           |
|--------|-------|------------------|------------------------|---|---|-------|---|---|-------|---|---|-----------|
| H18193 | 粗秆荔枝红 | Cuganlizhihong   | Wuxian, Jiangsu        | 0 | 0 | 0.999 | 0 | 0 | 0     | 0 | 0 | Sub-pop 3 |
| H18194 | 赤谷晚稻  | Chiguwandao      | Wujiang, Jiangsu       | 0 | 0 | 0.999 | 0 | 0 | 0     | 0 | 0 | Sub-pop 3 |
| H18195 | 茭白叶青  | Jiaobaiyeqing    | Songjiang,<br>Shanghai | 0 | 0 | 0.999 | 0 | 0 | 0     | 0 | 0 | Sub-pop 3 |
| H18196 | 迟谷红   | Chiguhong        | Wujiang, Jiangsu       | 0 | 0 | 0.999 | 0 | 0 | 0     | 0 | 0 | Sub-pop 3 |
| H18197 | 饭箩青   | Fanluoqing       | Kunshan, Jiangsu       | 0 | 0 | 0.999 | 0 | 0 | 0     | 0 | 0 | Sub-pop 3 |
| H18198 | 早野稻   | Zaoyedao         | Kunshan, Jiangsu       | 0 | 0 | 0.999 | 0 | 0 | 0     | 0 | 0 | Sub-pop 3 |
| H18199 | 白叠谷   | Baidiegu         | Wujiang, Jiangsu       | 0 | 0 | 0.999 | 0 | 0 | 0     | 0 | 0 | Sub-pop 3 |
| H18200 | 王家稻   | Wangjiadao       | Wujiang, Jiangsu       | 0 | 0 | 0.999 | 0 | 0 | 0     | 0 | 0 | Sub-pop 3 |
| H18201 | 江阴种   | Jiangyinzhong    | Jiangyin, Jiangsu      | 0 | 0 | 0.999 | 0 | 0 | 0     | 0 | 0 | Sub-pop 3 |
| H18202 | 鹅营白粳稻 | Eyingbaijingdao  | Jiading, Shanghai      | 0 | 0 | 0.999 | 0 | 0 | 0     | 0 | 0 | Sub-pop 3 |
| H18203 | 铁壳晚光头 | Tiekewanguangtou | Wujin, Jiangsu         | 0 | 0 | 0.999 | 0 | 0 | 0     | 0 | 0 | Sub-pop 3 |
| H18204 | 铁壳稻   | Tiekedao         | Wujin, Jiangsu         | 0 | 0 | 0.999 | 0 | 0 | 0     | 0 | 0 | Sub-pop 3 |
| H18205 | 大稻穗头  | Dadaosuitou      | Changshu, Jiangsu      | 0 | 0 | 0.915 | 0 | 0 | 0.084 | 0 | 0 | Sub-pop 3 |
| H18206 | 矮白稻   | Aibaidao         | Wujiang, Jiangsu       | 0 | 0 | 0.999 | 0 | 0 | 0     | 0 | 0 | Sub-pop 3 |
| H18207 | 小白稻   | Xiaobaidao       | Wuxian, Jiangsu        | 0 | 0 | 0.999 | 0 | 0 | 0     | 0 | 0 | Sub-pop 3 |
| H18208 | 白石稻   | Baishidao        | Taicang, Jiangsu       | 0 | 0 | 0.999 | 0 | 0 | 0     | 0 | 0 | Sub-pop 3 |
| H18209 | 慢白稻   | Manbaidao        | Wujiang, Jiangsu       | 0 | 0 | 0.999 | 0 | 0 | 0     | 0 | 0 | Sub-pop 3 |
| H18210 | 光头芦花白 | Guangtouluhuabai | Wuxi, Jiangsu          | 0 | 0 | 0.999 | 0 | 0 | 0     | 0 | 0 | Sub-pop 3 |
| H18211 | 红芒粳   | Hongmangjing     | Kunshan, Jiangsu       | 0 | 0 | 0.999 | 0 | 0 | 0     | 0 | 0 | Sub-pop 3 |
| H18212 | 无芒野稻  | Wumangyedao      | Changshu, Jiangsu      | 0 | 0 | 0.999 | 0 | 0 | 0     | 0 | 0 | Sub-pop 3 |

|        |        |                  |                        |   |   |       |       |   |       |   |   |           |
|--------|--------|------------------|------------------------|---|---|-------|-------|---|-------|---|---|-----------|
| H18213 | 芦花白    | Luhuabai         | Wuxian, Jiangsu        | 0 | 0 | 0.999 | 0     | 0 | 0     | 0 | 0 | Sub-pop 3 |
| H18214 | 海冬青    | Haidongqing      | Kunshan, Jiangsu       | 0 | 0 | 0.999 | 0     | 0 | 0     | 0 | 0 | Sub-pop 3 |
| H18215 | 神乐糯    | Shenlenuo        | Kunshan, Jiangsu       | 0 | 0 | 0.999 | 0     | 0 | 0     | 0 | 0 | Sub-pop 3 |
| H18216 | 湘晴     | Xiangqing        | Chongming,<br>Shanghai | 0 | 0 | 0.999 | 0     | 0 | 0     | 0 | 0 | Sub-pop 3 |
| H18217 | 粳恢 418 | Jinghui418       | Shenyang,<br>Liaoning  | 0 | 0 | 0.999 | 0     | 0 | 0     | 0 | 0 | Sub-pop 3 |
| H18218 | 马来红    | Malaihong        | Nanjing, Jiangsu       | 0 | 0 | 0.999 | 0     | 0 | 0     | 0 | 0 | Sub-pop 3 |
| H18219 | 粳糯 330 | Jingnuo330       | Hefei, Anhui           | 0 | 0 | 0.999 | 0     | 0 | 0     | 0 | 0 | Sub-pop 3 |
| H18220 | 再进粳    | Zaijinjing       | Huaian, Jiangsu        | 0 | 0 | 0.999 | 0     | 0 | 0     | 0 | 0 | Sub-pop 3 |
| H18221 | 富玉 3 号 | Fuyu3            | Yuexi, Anhui           | 0 | 0 | 0.999 | 0     | 0 | 0     | 0 | 0 | Sub-pop 3 |
| H18222 | R254   | R254             | Chongming,<br>Shanghai | 0 | 0 | 0.999 | 0     | 0 | 0     | 0 | 0 | Sub-pop 3 |
| H18223 | 江阴糯    | Jiangyinnuo      | Jiangyin, Jiangsu      | 0 | 0 | 0.999 | 0     | 0 | 0     | 0 | 0 | Sub-pop 3 |
| H18224 | 粳谷糯    | Jinggunuo        | Wuxi, Jiangsu          | 0 | 0 | 0.999 | 0     | 0 | 0     | 0 | 0 | Sub-pop 3 |
| H18225 | 单红谷    | Shanhonggu       | Wujiang, Jiangsu       | 0 | 0 | 0.999 | 0     | 0 | 0     | 0 | 0 | Sub-pop 3 |
| H18226 | 晚生毛黄   | Wanshengmaohuang | Wuxi, Jiangsu          | 0 | 0 | 0.996 | 0     | 0 | 0.003 | 0 | 0 | Sub-pop 3 |
| H18227 | 晚洋稻    | Wanyangdao       | Wuxian, Jiangsu        | 0 | 0 | 0.957 | 0     | 0 | 0.042 | 0 | 0 | Sub-pop 3 |
| H18228 | 矮大种    | Aidazhong        | Wujiang, Jiangsu       | 0 | 0 | 0.862 | 0     | 0 | 0.137 | 0 | 0 | Admix     |
| H18229 | 鸡脚红    | Jijiaohong       | Wuxian, Jiangsu        | 0 | 0 | 0.101 | 0.898 | 0 | 0     | 0 | 0 | Admix     |
| H18230 | 偷来种    | Toulaizhong      | Wujiang, Jiangsu       | 0 | 0 | 0.146 | 0.853 | 0 | 0     | 0 | 0 | Admix     |



|        |                |                    |                       |   |       |       |       |   |   |   |   |           |
|--------|----------------|--------------------|-----------------------|---|-------|-------|-------|---|---|---|---|-----------|
| H18231 | 花壳诺            | Huakenuo           | Wujiang, Jiangsu      | 0 | 0     | 0.001 | 0.999 | 0 | 0 | 0 | 0 | Admix     |
| H18232 | 头等一时兴          | Toudengyishixing   | Kunshan, Jiangsu      | 0 | 0     | 0     | 1     | 0 | 0 | 0 | 0 | Sub-pop 4 |
| H18233 | 帽子头            | Maozitou           | Wujiang, Jiangsu      | 0 | 0.001 | 0.013 | 0.985 | 0 | 0 | 0 | 0 | Sub-pop 4 |
| H18234 | 早糯稻            | Zaonuodao          | Wujiang, Jiangsu      | 0 | 0     | 0.01  | 0.989 | 0 | 0 | 0 | 0 | Sub-pop 4 |
| H18235 | 大头鬼            | Datougui           | Changshu, Jiangsu     | 0 | 0.001 | 0.002 | 0.996 | 0 | 0 | 0 | 0 | Sub-pop 4 |
| H18236 | 早小白稻           | Zaoxiaobaidao      | Wuxi, Jiangsu         | 0 | 0     | 0.007 | 0.992 | 0 | 0 | 0 | 0 | Sub-pop 4 |
| H18237 | 杭州糯            | Kangzhounuo        | Wujiang, Jiangsu      | 0 | 0     | 0.002 | 0.997 | 0 | 0 | 0 | 0 | Sub-pop 4 |
| H18238 | 阔板种            | Kuobanzhong        | Qingpu, Shanghai      | 0 | 0     | 0.065 | 0.934 | 0 | 0 | 0 | 0 | Sub-pop 4 |
| H18239 | 黄壳晚光头          | Huangkewanguangtou | Wujin, Jiangsu        | 0 | 0     | 0.078 | 0.921 | 0 | 0 | 0 | 0 | Sub-pop 4 |
| H18240 | 铁捍一时兴          | Tiehanyishixing    | Wuxi, Jiangsu         | 0 | 0.001 | 0.008 | 0.99  | 0 | 0 | 0 | 0 | Sub-pop 4 |
| H18241 | 矮脚芦秆黄          | Aijiaoluganhuang   | Changshu, Jiangsu     | 0 | 0     | 0     | 1     | 0 | 0 | 0 | 0 | Sub-pop 4 |
| H18242 | 中花 3 号         | Zhonghua3          | Haidian, Beijing      | 0 | 0     | 0     | 1     | 0 | 0 | 0 | 0 | Sub-pop 4 |
| H18243 | 补血糯            | Buxienuo           | kunshan, Jiangsu      | 0 | 0     | 0     | 1     | 0 | 0 | 0 | 0 | Sub-pop 4 |
| H18244 | 皖粳糯            | Wanjingnuo         | Hefei, Anhui          | 0 | 0     | 0     | 1     | 0 | 0 | 0 | 0 | Sub-pop 4 |
| H18245 | C418           | C418               | Shenyang,<br>Liaoning | 0 | 0     | 0     | 1     | 0 | 0 | 0 | 0 | Sub-pop 4 |
| H18246 | 富香 1 号         | Fuxiang1           | Yuxi, Anhui           | 0 | 0     | 0     | 1     | 0 | 0 | 0 | 0 | Sub-pop 4 |
| H18247 | 越 1 (BT1)      | Yue1 (BT1)         | Vietnam               | 0 | 0     | 0     | 1     | 0 | 0 | 0 | 0 | Sub-pop 4 |
| H18248 | 越 2 (ML203)    | Yue2 (ML203)       | Vietnam               | 0 | 0     | 0     | 1     | 0 | 0 | 0 | 0 | Sub-pop 4 |
| H18249 | 越 3(2490)      | Yue3(2490)         | Vietnam               | 0 | 0     | 0     | 1     | 0 | 0 | 0 | 0 | Sub-pop 4 |
| H18250 | 越 4[88-6(HH)3] | Yue4[88-6(HH)3]    | Vietnam               | 0 | 0     | 0     | 1     | 0 | 0 | 0 | 0 | Sub-pop 4 |

|        |                 |                  |         |   |   |   |       |   |       |   |   |           |
|--------|-----------------|------------------|---------|---|---|---|-------|---|-------|---|---|-----------|
| H18251 | 越 5(KD)         | Yue5(KD)         | Vietnam | 0 | 0 | 0 | 1     | 0 | 0     | 0 | 0 | Sub-pop 4 |
| H18252 | 越 6(N202)       | Yue6(N202)       | Vietnam | 0 | 0 | 0 | 1     | 0 | 0     | 0 | 0 | Sub-pop 4 |
| H18253 | 越 8(VD108-1)    | Yue8(VD108-1)    | Vietnam | 0 | 0 | 0 | 1     | 0 | 0     | 0 | 0 | Sub-pop 4 |
| H18254 | 越 9(KD18)       | Yue9(KD18)       | Vietnam | 0 | 0 | 0 | 1     | 0 | 0     | 0 | 0 | Sub-pop 4 |
| H18255 | 越 10(DB5)       | Yue10(DB5)       | Vietnam | 0 | 0 | 0 | 1     | 0 | 0     | 0 | 0 | Sub-pop 4 |
| H18256 | 越 11(VD7)       | Yue11(VD7)       | Vietnam | 0 | 0 | 0 | 1     | 0 | 0     | 0 | 0 | Sub-pop 4 |
| H18257 | 越 12(OM2718)    | Yue12(OM2718)    | Vietnam | 0 | 0 | 0 | 1     | 0 | 0     | 0 | 0 | Sub-pop 4 |
| H18258 | 越 13(AYTO1)     | Yue13(AYTO1)     | Vietnam | 0 | 0 | 0 | 1     | 0 | 0     | 0 | 0 | Sub-pop 4 |
| H18259 | 越 14(KDDB)      | Yue14(KDDB)      | Vietnam | 0 | 0 | 0 | 0.999 | 0 | 0     | 0 | 0 | Sub-pop 4 |
| H18260 | 越 15(OM3003)    | Yue15(OM3003)    | Vietnam | 0 | 0 | 0 | 0.999 | 0 | 0     | 0 | 0 | Sub-pop 4 |
| H18261 | 越 16(DB6)       | Yue16(DB6)       | Vietnam | 0 | 0 | 0 | 0.999 | 0 | 0     | 0 | 0 | Sub-pop 4 |
| H18262 | 越 17(ML202)     | Yue17(ML202)     | Vietnam | 0 | 0 | 0 | 0.999 | 0 | 0     | 0 | 0 | Sub-pop 4 |
| H18263 | 越 18(AYTO1-D12) | Yue18(AYTO1-D12) | Vietnam | 0 | 0 | 0 | 0.999 | 0 | 0     | 0 | 0 | Sub-pop 4 |
| H18264 | 越 19(AYTO1-D12) | Yue19(AYTO1-D12) | Vietnam | 0 | 0 | 0 | 0.999 | 0 | 0     | 0 | 0 | Sub-pop 4 |
| H18265 | 越 20(OM1490)    | Yue20(OM1490)    | Vietnam | 0 | 0 | 0 | 0.999 | 0 | 0     | 0 | 0 | Sub-pop 4 |
| H18266 | 越 21(94-3-1)    | Yue21(94-3-1)    | Vietnam | 0 | 0 | 0 | 0.999 | 0 | 0.001 | 0 | 0 | Sub-pop 4 |
| H18267 | 越 22(LCV22)     | Yue22(LCV22)     | Vietnam | 0 | 0 | 0 | 0.999 | 0 | 0     | 0 | 0 | Sub-pop 4 |
| H18268 | 越 23(LCV10)     | Yue23(LCV10)     | Vietnam | 0 | 0 | 0 | 0.999 | 0 | 0     | 0 | 0 | Sub-pop 4 |
| H18269 | 越 24 (LCV18)    | Yue24 (LCV18)    | Vietnam | 0 | 0 | 0 | 0.999 | 0 | 0     | 0 | 0 | Sub-pop 4 |

|        |               |                |         |   |   |   |       |   |       |   |   |           |
|--------|---------------|----------------|---------|---|---|---|-------|---|-------|---|---|-----------|
| H18270 | 越 25 (121)    | Yue25 (121)    | Vietnam | 0 | 0 | 0 | 0.999 | 0 | 0     | 0 | 0 | Sub-pop 4 |
| H18271 | 越 26 (75)     | Yue26 (75)     | Vietnam | 0 | 0 | 0 | 0.999 | 0 | 0     | 0 | 0 | Sub-pop 4 |
| H18272 | 越 27 (52)     | Yue27 (52)     | Vietnam | 0 | 0 | 0 | 0.999 | 0 | 0     | 0 | 0 | Sub-pop 4 |
| H18273 | 越 28 (49)     | Yue28 (49)     | Vietnam | 0 | 0 | 0 | 0.999 | 0 | 0     | 0 | 0 | Sub-pop 4 |
| H18274 | 越 29 (3)      | Yue29 (3)      | Vietnam | 0 | 0 | 0 | 0.999 | 0 | 0     | 0 | 0 | Sub-pop 4 |
| H18275 | 越 30 (3)      | Yue30 (3)      | Vietnam | 0 | 0 | 0 | 0.999 | 0 | 0     | 0 | 0 | Sub-pop 4 |
| H18276 | 越 31 (45)     | Yue31 (45)     | Vietnam | 0 | 0 | 0 | 0     | 0 | 0.999 | 0 | 0 | Sub-pop 6 |
| H18277 | 越 32[16(10)]  | Yue32[16(10)]  | Vietnam | 0 | 0 | 0 | 0     | 0 | 0.999 | 0 | 0 | Sub-pop 6 |
| H18278 | 越 33(8603)    | Yue33(8603)    | Vietnam | 0 | 0 | 0 | 0     | 0 | 0.999 | 0 | 0 | Sub-pop 6 |
| H18279 | 越 34(15.9-4)  | Yue34(15.9-4)  | Vietnam | 0 | 0 | 0 | 0     | 0 | 0.999 | 0 | 0 | Sub-pop 6 |
| H18280 | 越 35(53)      | Yue35(53)      | Vietnam | 0 | 0 | 0 | 0     | 0 | 0.999 | 0 | 0 | Sub-pop 6 |
| H18281 | 越 36(17.10-1) | Yue36(17.10-1) | Vietnam | 0 | 0 | 0 | 0     | 0 | 0.999 | 0 | 0 | Sub-pop 6 |
| H18282 | 越 37(2)       | Yue37(2)       | Vietnam | 0 | 0 | 0 | 0     | 0 | 0.999 | 0 | 0 | Sub-pop 6 |
| H18283 | 越 38(70)      | Yue38(70)      | Vietnam | 0 | 0 | 0 | 0     | 0 | 0.999 | 0 | 0 | Sub-pop 6 |
| H18284 | 越 39(34)      | Yue39(34)      | Vietnam | 0 | 0 | 0 | 0     | 0 | 0.999 | 0 | 0 | Sub-pop 6 |
| H18285 | 越 41(47)      | Yue41(47)      | Vietnam | 0 | 0 | 0 | 0     | 0 | 1     | 0 | 0 | Sub-pop 6 |
| H18286 | 越 42(85)      | Yue42(85)      | Vietnam | 0 | 0 | 0 | 0     | 0 | 0.999 | 0 | 0 | Sub-pop 6 |
| H18287 | 越 43(59)      | Yue43(59)      | Vietnam | 0 | 0 | 0 | 0     | 0 | 0.999 | 0 | 0 | Sub-pop 6 |
| H18288 | 越 44(59)      | Yue44(59)      | Vietnam | 0 | 0 | 0 | 0     | 0 | 0.999 | 0 | 0 | Sub-pop 6 |
| H18289 | 越 45(PC5)     | Yue45(PC5)     | Vietnam | 0 | 0 | 0 | 0     | 0 | 0.999 | 0 | 0 | Sub-pop 6 |

|        |                 |                             |         |   |   |   |   |   |       |   |   |           |
|--------|-----------------|-----------------------------|---------|---|---|---|---|---|-------|---|---|-----------|
| H18290 | 越 46(PC6)       | Yue46(PC6)                  | Vietnam | 0 | 0 | 0 | 0 | 0 | 0.999 | 0 | 0 | Sub-pop 6 |
| H18291 | 越 47(HT1)       | Yue47(HT1)                  | Vietnam | 0 | 0 | 0 | 0 | 0 | 0.999 | 0 | 0 | Sub-pop 6 |
| H18292 | 越 48(D6)        | Yue48(D6)                   | Vietnam | 0 | 0 | 0 | 0 | 0 | 0.999 | 0 | 0 | Sub-pop 6 |
| H18293 | 越 49(AC5)       | Yue49(AC5)                  | Vietnam | 0 | 0 | 0 | 0 | 0 | 0.999 | 0 | 0 | Sub-pop 6 |
| H18294 | 越 50(KHAO 85)   | Yue50(KHAO 85)              | Vietnam | 0 | 0 | 0 | 0 | 0 | 0.999 | 0 | 0 | Sub-pop 6 |
| H18295 | 越 52 (5028)     | Yue52 (5028)                | Vietnam | 0 | 0 | 0 | 0 | 0 | 0.999 | 0 | 0 | Sub-pop 6 |
| H18296 | 越 54 (B0T1)     | Yue54 (B0T1)                | Vietnam | 0 | 0 | 0 | 0 | 0 | 0.999 | 0 | 0 | Sub-pop 6 |
| H18297 | 越 56 (IR64)     | Yue56 (IR64)                | Vietnam | 0 | 0 | 0 | 0 | 0 | 1     | 0 | 0 | Sub-pop 6 |
| H18298 | 越 57 (254)      | Yue57 (254)                 | Vietnam | 0 | 0 | 0 | 0 | 0 | 0.999 | 0 | 0 | Sub-pop 6 |
| H18299 | 越 58 (T10)      | Yue58 (T10)                 | Vietnam | 0 | 0 | 0 | 0 | 0 | 0.999 | 0 | 0 | Sub-pop 6 |
| H18300 | 越 59 (BT7 中国)   | Yue59 (BT7China)            | Vietnam | 0 | 0 | 0 | 0 | 0 | 0.999 | 0 | 0 | Sub-pop 6 |
| H18301 | 越 60 (PC8)      | Yue60 (PC8)                 | Vietnam | 0 | 0 | 0 | 0 | 0 | 0.999 | 0 | 0 | Sub-pop 6 |
| H18302 | 越 61(D19)       | Yue61(D19)                  | Vietnam | 0 | 0 | 0 | 0 | 0 | 0.999 | 0 | 0 | Sub-pop 6 |
| H18303 | 越 62(D28)       | Yue62(D28)                  | Vietnam | 0 | 0 | 0 | 0 | 0 | 0.999 | 0 | 0 | Sub-pop 6 |
| H18304 | 越 63(VN2002-1)  | Yue63(VN2002-1)             | Vietnam | 0 | 0 | 0 | 0 | 0 | 0.999 | 0 | 0 | Sub-pop 6 |
| H18305 | 越 64(DSDL 台湾特色) | Yue64(DSDL Taiwan Features) | Vietnam | 0 | 0 | 0 | 0 | 0 | 0.999 | 0 | 0 | Sub-pop 6 |
| H18306 | 越 66(CL9)       | Yue66(CL9)                  | Vietnam | 0 | 0 | 0 | 0 | 0 | 0.999 | 0 | 0 | Sub-pop 6 |
| H18307 | 越 68(PC10)      | Yue68(PC10)                 | Vietnam | 0 | 0 | 0 | 0 | 0 | 0.999 | 0 | 0 | Sub-pop 6 |
| H18308 | 越 69(3486)      | Yue69(3486)                 | Vietnam | 0 | 0 | 0 | 0 | 0 | 0.999 | 0 | 0 | Sub-pop 6 |

|        |                 |                  |         |       |       |       |       |       |       |       |       |           |
|--------|-----------------|------------------|---------|-------|-------|-------|-------|-------|-------|-------|-------|-----------|
| H18309 | 越 70(PC7)       | Yue70(PC7)       | Vietnam | 0     | 0     | 0     | 0     | 0     | 0.999 | 0     | 0     | Sub-pop 6 |
| H18310 | 越 71(N2-08)     | Yue71(N2-08)     | Vietnam | 0     | 0     | 0     | 0     | 0     | 0.999 | 0     | 0     | Sub-pop 6 |
| H18311 | 越 72(N1-08)     | Yue72(N1-08)     | Vietnam | 0     | 0     | 0     | 0.413 | 0     | 0.586 | 0     | 0     | Admix     |
| H18312 | 越 73(GIA LOC 6) | Yue73(GIA LOC 6) | Vietnam | 0     | 0     | 0.001 | 0     | 0.001 | 0.997 | 0     | 0     | Sub-pop 6 |
| H18313 | 越 74(N4-05)     | Yue74(N4-05)     | Vietnam | 0     | 0     | 0     | 0     | 0     | 0.999 | 0     | 0     | Sub-pop 6 |
| H18314 | 越 75(N3-05)     | Yue75(N3-05)     | Vietnam | 0     | 0     | 0     | 0     | 0     | 0.999 | 0     | 0     | Sub-pop 6 |
| H18315 | 越 76(7133)      | Yue76(7133)      | Vietnam | 0     | 0     | 0     | 0     | 0     | 0.999 | 0     | 0     | Sub-pop 6 |
| H18316 | 越 77(NEP 98)    | Yue77(NEP 98)    | Vietnam | 0     | 0     | 0     | 0     | 0     | 0.999 | 0     | 0     | Sub-pop 6 |
| H18317 | 越 78(NEP QUYT)  | Yue78(NEP QUYT)  | Vietnam | 0     | 0     | 0     | 0     | 0     | 0.999 | 0     | 0     | Sub-pop 6 |
| H18318 | 越 79(DB1)       | Yue79(DB1)       | Vietnam | 0     | 0     | 0     | 0     | 0     | 0.999 | 0     | 0     | Sub-pop 6 |
| H18319 | 越 80(DB1)       | Yue80(DB1)       | Vietnam | 0     | 0     | 0     | 0     | 0     | 0.999 | 0     | 0     | Sub-pop 6 |
| H18320 | 越 81(61)        | Yue81(61)        | Vietnam | 0     | 0     | 0     | 0     | 0     | 0.999 | 0     | 0     | Sub-pop 6 |
| H18321 | 越 82(17.11-2)   | Yue82(17.11-2)   | Vietnam | 0     | 0.001 | 0.002 | 0     | 0.011 | 0.984 | 0     | 0.001 | Sub-pop 6 |
| H18322 | 越 83(BM207)     | Yue83(BM207)     | Vietnam | 0     | 0     | 0     | 0     | 0     | 0.999 | 0     | 0     | Sub-pop 6 |
| H18323 | 越 84(NX30)      | Yue84(NX30)      | Vietnam | 0.001 | 0.005 | 0.001 | 0     | 0.004 | 0.988 | 0.001 | 0     | Sub-pop 6 |
| H18324 | 越 85(HT9)       | Yue85(HT9)       | Vietnam | 0     | 0     | 0     | 0     | 0     | 0.999 | 0     | 0     | Sub-pop 6 |
| H18325 | 越 86(KHAU CUI)  | Yue86(KHAU CUI)  | Vietnam | 0     | 0     | 0     | 0     | 0     | 0.999 | 0     | 0     | Sub-pop 6 |
| H18326 | 越 87(69)        | Yue87(69)        | Vietnam | 0     | 0     | 0     | 0     | 0     | 0.999 | 0     | 0     | Sub-pop 6 |

|        |                 |                  |         |   |       |       |       |       |       |       |       |           |
|--------|-----------------|------------------|---------|---|-------|-------|-------|-------|-------|-------|-------|-----------|
| H18327 | 越 88(60)        | Yue88(60)        | Vietnam | 0 | 0     | 0     | 0     | 0     | 0.999 | 0     | 0     | Sub-pop 6 |
| H18328 | 越 89(54)        | Yue89(54)        | Vietnam | 0 | 0     | 0     | 0     | 0     | 0.999 | 0     | 0     | Sub-pop 6 |
| H18329 | 越 90(AC5-T)     | Yue90(AC5-T)     | Vietnam | 0 | 0     | 0     | 0     | 0     | 0.999 | 0     | 0     | Sub-pop 6 |
| H18330 | 越 91(N16-12)    | Yue91(N16-12)    | Vietnam | 0 | 0     | 0     | 0     | 0     | 0.999 | 0     | 0     | Sub-pop 6 |
| H18331 | 越 93(N2-08-1)   | Yue93(N2-08-1)   | Vietnam | 0 | 0     | 0     | 0     | 0     | 0.999 | 0     | 0     | Sub-pop 6 |
| H18332 | 越 9412.6-1      | Yue9412.6-1      | Vietnam | 0 | 0     | 0     | 0     | 0     | 0.999 | 0     | 0     | Sub-pop 6 |
| H18333 | 越 95(P11)       | Yue95(P11)       | Vietnam | 0 | 0     | 0     | 0     | 0     | 0.999 | 0     | 0     | Sub-pop 6 |
| H18334 | 越 96 (688)      | Yue96 (688)      | Vietnam | 0 | 0.002 | 0.003 | 0     | 0.001 | 0.987 | 0.006 | 0     | Sub-pop 6 |
| H18335 | 越 97 (12.6)     | Yue97 (12.6)     | Vietnam | 0 | 0     | 0     | 0     | 0     | 0.999 | 0     | 0     | Sub-pop 6 |
| H18336 | 越 98 (49.1)     | Yue98 (49.1)     | Vietnam | 0 | 0     | 0     | 0     | 0     | 0.999 | 0     | 0     | Sub-pop 6 |
| H18337 | 越 99 (8.3-1-22) | Yue99 (8.3-1-22) | Vietnam | 0 | 0     | 0     | 0     | 0     | 0.999 | 0     | 0     | Sub-pop 6 |
| H18338 | 越 100 (BM205)   | Yue100 (BM205)   | Vietnam | 0 | 0     | 0     | 0     | 0     | 0.999 | 0     | 0     | Sub-pop 6 |
| H18339 | 越 101 (NEP 87)  | Yue101 (NEP 87)  | Vietnam | 0 | 0     | 0     | 0     | 0     | 0.999 | 0     | 0     | Sub-pop 6 |
| H18340 | 越 102 (BM216)   | Yue102 (BM216)   | Vietnam | 0 | 0     | 0     | 0.412 | 0     | 0.588 | 0     | 0     | Admix     |
| H18341 | 越 103 (1)       | Yue103 (1)       | Vietnam | 0 | 0     | 0     | 0     | 0     | 0.999 | 0     | 0     | Sub-pop 6 |
| H18342 | 越 104 (LHD5)    | Yue104 (LHD5)    | Vietnam | 0 | 0.001 | 0.007 | 0     | 0.002 | 0.988 | 0.001 | 0.001 | Sub-pop 6 |
| H18343 | 越 105 (X26)     | Yue105 (X26)     | Vietnam | 0 | 0     | 0     | 0     | 0     | 0.999 | 0     | 0     | Sub-pop 6 |
| H18344 | 越 106 (BM214)   | Yue106 (BM214)   | Vietnam | 0 | 0     | 0     | 0     | 0     | 0.999 | 0     | 0     | Sub-pop 6 |
| H18345 | 越 107 (BM217)   | Yue107 (BM217)   | Vietnam | 0 | 0     | 0     | 0     | 0     | 0.999 | 0     | 0     | Sub-pop 6 |
| H18346 | 越 109 (9603)    | Yue109 (9603)    | Vietnam | 0 | 0     | 0     | 0     | 0     | 0.999 | 0     | 0     | Sub-pop 6 |

|        |                   |                  |                  |   |       |       |   |       |       |       |   |           |
|--------|-------------------|------------------|------------------|---|-------|-------|---|-------|-------|-------|---|-----------|
| H18347 | 越 110 (9)         | Yue110 (9)       | Vietnam          | 0 | 0     | 0     | 0 | 0     | 0.999 | 0     | 0 | Sub-pop 6 |
| H18348 | 越 111 (N98)       | Yue111 (N98)     | Vietnam          | 0 | 0     | 0     | 0 | 0     | 0.999 | 0     | 0 | Sub-pop 6 |
| H18349 | 越 112 (4)         | Yue112 (4)       | Vietnam          | 0 | 0     | 0     | 0 | 0     | 0.999 | 0     | 0 | Sub-pop 6 |
| H18350 | 越 113 (KD 中<br>国) | Yue113 (KDChina) | Vietnam          | 0 | 0     | 0     | 0 | 0     | 0.999 | 0     | 0 | Sub-pop 6 |
| H18351 | 越 114 (HT6)       | Yue114 (HT6)     | Vietnam          | 0 | 0     | 0     | 0 | 0     | 0.999 | 0     | 0 | Sub-pop 6 |
| H18352 | 越 115 (5)         | Yue115 (5)       | Vietnam          | 0 | 0.001 | 0.025 | 0 | 0     | 0.974 | 0     | 0 | Sub-pop 6 |
| H18353 | 越 116 (8)         | Yue116 (8)       | Vietnam          | 0 | 0     | 0     | 0 | 0     | 0.999 | 0     | 0 | Sub-pop 6 |
| H18354 | 越 117 (HT9)       | Yue117 (HT9)     | Vietnam          | 0 | 0     | 0     | 0 | 0     | 0.999 | 0     | 0 | Sub-pop 6 |
| H18355 | 越 118 (2)         | Yue118 (2)       | Vietnam          | 0 | 0     | 0     | 0 | 0     | 0.999 | 0     | 0 | Sub-pop 6 |
| H18356 | 越 119 (N02)       | Yue119 (N02)     | Vietnam          | 0 | 0     | 0     | 0 | 0     | 0.999 | 0     | 0 | Sub-pop 6 |
| H18357 | 越 120 (3)         | Yue120 (3)       | Vietnam          | 0 | 0     | 0     | 0 | 0     | 0.999 | 0     | 0 | Sub-pop 6 |
| H18358 | 越 121 (1)         | Yue121 (1)       | Vietnam          | 0 | 0     | 0     | 0 | 0     | 0.999 | 0     | 0 | Sub-pop 6 |
| H18359 | 飞来凤               | Feilaifeng       | Wuxi, Jiangsu    | 0 | 0     | 0     | 0 | 0     | 0.999 | 0     | 0 | Sub-pop 6 |
| H18360 | 南农粳 3786          | Nannongjing3786  | Nanjing, Jiangsu | 0 | 0     | 0     | 0 | 0     | 0.999 | 0     | 0 | Sub-pop 6 |
| H18361 | 24248             | 24248            | Nanjing, Jiangsu | 0 | 0     | 0     | 0 | 0     | 0.999 | 0     | 0 | Sub-pop 6 |
| H18362 | 南农粳 4004          | Nannongjing4004  | Nanjing, Jiangsu | 0 | 0     | 0     | 0 | 0     | 0.999 | 0     | 0 | Sub-pop 6 |
| H18363 | 南农粳 4016          | Nannongjing4016  | Nanjing, Jiangsu | 0 | 0     | 0     | 0 | 0     | 0.999 | 0     | 0 | Sub-pop 6 |
| H18364 | 紫尖武粳              | Zijianwujing     | Nanjing, Jiangsu | 0 | 0.007 | 0.006 | 0 | 0.001 | 0.984 | 0.001 | 0 | Sub-pop 6 |
| H18365 | 武香 99-8           | Wuxiang99-8      | Wujin, Jiangsu   | 0 | 0     | 0     | 0 | 0     | 0.999 | 0     | 0 | Sub-pop 6 |
| H18366 | 武运粳 8 号           | Wuyujing8        | Wujin, Jiangsu   | 0 | 0     | 0     | 0 | 0     | 0.999 | 0     | 0 | Sub-pop 6 |

|        |          |                |                         |   |   |       |       |       |       |   |   |           |
|--------|----------|----------------|-------------------------|---|---|-------|-------|-------|-------|---|---|-----------|
| H18367 | 南农粳 002  | Nannongjing002 | Nanjing, Jiangsu        | 0 | 0 | 0     | 0     | 0     | 0.999 | 0 | 0 | Sub-pop 6 |
| H18368 | 南农粳 004  | Nannongjing004 | Nanjing, Jiangsu        | 0 | 0 | 0     | 0     | 0     | 0.999 | 0 | 0 | Sub-pop 6 |
| H18369 | 淮稻 5 号   | Huaidao5hao    | Huaian, Jiangsu         | 0 | 0 | 0     | 0     | 0.532 | 0.467 | 0 | 0 | Admix     |
| H18370 | 中作 93    | Zhongzuo93     | Tongzhou, Beijing       | 0 | 0 | 0.002 | 0.001 | 0.577 | 0.42  | 0 | 0 | Admix     |
| H18371 | 盐稻 9 号   | Yandao9        | Yancheng, Jiangsu       | 0 | 0 | 0     | 0     | 0.577 | 0.422 | 0 | 0 | Admix     |
| H18372 | 连粳 4 号   | Lianjing4      | Lianyungang,<br>Jiangsu | 0 | 0 | 0     | 0     | 0.592 | 0.407 | 0 | 0 | Admix     |
| H18373 | 津稻 1007  | Jindao1007     | Dongli, Tianjin         | 0 | 0 | 0     | 0     | 0.609 | 0.39  | 0 | 0 | Admix     |
| H18374 | 华粳 5 号   | Huajing5       | Huaipei, Jiangsu        | 0 | 0 | 0.003 | 0     | 0.716 | 0.279 | 0 | 0 | Admix     |
| H18375 | 华粳 6 号   | Huajing6       | Huaipei, Jiangsu        | 0 | 0 | 0.001 | 0     | 0.622 | 0.375 | 0 | 0 | Admix     |
| H18376 | 扬辐粳 7 号  | Yangfujing7    | Lixiahe, Jiangsu        | 0 | 0 | 0.001 | 0     | 0.642 | 0.356 | 0 | 0 | Admix     |
| H18377 | 扬辐粳 8 号  | Yangfujing8    | Lixiahe, Jiangsu        | 0 | 0 | 0     | 0     | 0.999 | 0     | 0 | 0 | Sub-pop 5 |
| H18378 | 镇稻 99    | Zhendao99      | Zhenjiang, Jiangsu      | 0 | 0 | 0     | 0     | 0.999 | 0     | 0 | 0 | Sub-pop 5 |
| H18379 | 南粳 42    | Nanjing42      | Nanjing, Jiangsu        | 0 | 0 | 0     | 0     | 0.999 | 0     | 0 | 0 | Sub-pop 5 |
| H18380 | 连粳 9823  | Lianjing9823   | Lianyungang,<br>Jiangsu | 0 | 0 | 0     | 0     | 0.999 | 0     | 0 | 0 | Sub-pop 5 |
| H18381 | 辉丰 1     | Huifeng1       | Yancheng, Jiangsu       | 0 | 0 | 0     | 0     | 0.999 | 0     | 0 | 0 | Sub-pop 5 |
| H18382 | 辉丰 2     | Huifeng2       | Yancheng, Jiangsu       | 0 | 0 | 0     | 0     | 0.999 | 0     | 0 | 0 | Sub-pop 5 |
| H18383 | 盐稻 8 号   | Yandao8        | Yancheng, Jiangsu       | 0 | 0 | 0     | 0     | 0.999 | 0     | 0 | 0 | Sub-pop 5 |
| H18384 | 武运粳 21 号 | Wuyujing21     | Wujin, Jiangsu          | 0 | 0 | 0     | 0     | 0.999 | 0     | 0 | 0 | Sub-pop 5 |



|        |         |              |                               |   |   |   |   |       |   |   |   |           |
|--------|---------|--------------|-------------------------------|---|---|---|---|-------|---|---|---|-----------|
| H18385 | 莎莎妮     | Shashani     | Haerbin,<br>Heilongjiang      | 0 | 0 | 0 | 0 | 0.999 | 0 | 0 | 0 | Sub-pop 5 |
| H18386 | 牡粘 4 号  | Muzhan4      | Mudanjiang,<br>Heilongjiang   | 0 | 0 | 0 | 0 | 0.999 | 0 | 0 | 0 | Sub-pop 5 |
| H18387 | 牡丹江 29  | Mudanjiang29 | Mudanjiang,<br>Heilongjiang   | 0 | 0 | 0 | 0 | 0.999 | 0 | 0 | 0 | Sub-pop 5 |
| H18388 | 牡丹江 28  | Mudanjiang28 | Mudanjiang,<br>Heilongjiang   | 0 | 0 | 0 | 0 | 0.999 | 0 | 0 | 0 | Sub-pop 5 |
| H18389 | 牡丹江 27  | Mudanjiang27 | Mudanjiang,<br>Heilongjiang   | 0 | 0 | 0 | 0 | 0.999 | 0 | 0 | 0 | Sub-pop 5 |
| H18390 | 垦粘 2 号  | Kenzhan2     | Nongken,<br>Heilongjiang      | 0 | 0 | 0 | 0 | 0.999 | 0 | 0 | 0 | Sub-pop 5 |
| H18391 | 黑粳 8 号  | Heijing8     | Haerbin,<br>Heilongjiang      | 0 | 0 | 0 | 0 | 0.999 | 0 | 0 | 0 | Sub-pop 5 |
| H18392 | 合粳 1 号  | Hejing1      | Haerbin,<br>Heilongjiang      | 0 | 0 | 0 | 0 | 0.999 | 0 | 0 | 0 | Sub-pop 5 |
| H18393 | 北稻 4 号  | Beidao4      | Haerbin,<br>Heilongjiang      | 0 | 0 | 0 | 0 | 0.999 | 0 | 0 | 0 | Sub-pop 5 |
| H18394 | 北稻 3 号  | Beidao3      | Haerbin,<br>Heilongjiang      | 0 | 0 | 0 | 0 | 0.999 | 0 | 0 | 0 | Sub-pop 5 |
| H18395 | 绥粳 12 号 | Suijing12    | Suihua,<br>Heilongjiang       | 0 | 0 | 0 | 0 | 0.999 | 0 | 0 | 0 | Sub-pop 5 |
| H18396 | 松粳 12   | Songjing12   | Songhuajiang,<br>Heilongjiang | 0 | 0 | 0 | 0 | 0.999 | 0 | 0 | 0 | Sub-pop 5 |

|        |        |             |                               |   |   |   |   |       |   |   |   |           |
|--------|--------|-------------|-------------------------------|---|---|---|---|-------|---|---|---|-----------|
| H18397 | 松粳 11  | Songjing11  | Songhuajiang,<br>Heilongjiang | 0 | 0 | 0 | 0 | 0.999 | 0 | 0 | 0 | Sub-pop 5 |
| H18398 | 松粳 10  | Songjing10  | Songhuajiang,<br>Heilongjiang | 0 | 0 | 0 | 0 | 0.999 | 0 | 0 | 0 | Sub-pop 5 |
| H18399 | 东农 430 | Dongnong430 | Haerbin,<br>Heilongjiang      | 0 | 0 | 0 | 0 | 0.999 | 0 | 0 | 0 | Sub-pop 5 |
| H18400 | 东农 424 | Dongnong424 | Haerbin,<br>Heilongjiang      | 0 | 0 | 0 | 0 | 0.999 | 0 | 0 | 0 | Sub-pop 5 |
| H18401 | 龙糯 3 号 | Longnuo3    | Haerbin,<br>Heilongjiang      | 0 | 0 | 0 | 0 | 1     | 0 | 0 | 0 | Sub-pop 5 |
| H18402 | 龙粳 28  | Longjing28  | Haerbin,<br>Heilongjiang      | 0 | 0 | 0 | 0 | 0.999 | 0 | 0 | 0 | Sub-pop 5 |
| H18403 | 龙粳 27  | Longjing27  | Haerbin,<br>Heilongjiang      | 0 | 0 | 0 | 0 | 0.999 | 0 | 0 | 0 | Sub-pop 5 |
| H18404 | 龙粳 26  | Longjing26  | Haerbin,<br>Heilongjiang      | 0 | 0 | 0 | 0 | 0.999 | 0 | 0 | 0 | Sub-pop 5 |
| H18405 | 龙粳 25  | Longjing25  | Haerbin,<br>Heilongjiang      | 0 | 0 | 0 | 0 | 0.999 | 0 | 0 | 0 | Sub-pop 5 |
| H18406 | 龙粳 24  | Longjing24  | Haerbin,<br>Heilongjiang      | 0 | 0 | 0 | 0 | 0.999 | 0 | 0 | 0 | Sub-pop 5 |
| H18407 | 龙粳 22  | Longjing22  | Haerbin,<br>Heilongjiang      | 0 | 0 | 0 | 0 | 0.999 | 0 | 0 | 0 | Sub-pop 5 |
| H18408 | 龙粳 21  | Longjing21  | Haerbin,<br>Heilongjiang      | 0 | 0 | 0 | 0 | 0.999 | 0 | 0 | 0 | Sub-pop 5 |

|        |         |               |                          |   |   |   |   |       |   |   |   |           |
|--------|---------|---------------|--------------------------|---|---|---|---|-------|---|---|---|-----------|
| H18409 | 龙粳 20   | Longjing20    | Haerbin,<br>Heilongjiang | 0 | 0 | 0 | 0 | 0.999 | 0 | 0 | 0 | Sub-pop 5 |
| H18410 | 龙粳 19   | Longjing19    | Haerbin,<br>Heilongjiang | 0 | 0 | 0 | 0 | 0.999 | 0 | 0 | 0 | Sub-pop 5 |
| H18411 | 龙粳 18   | Longjing18    | Haerbin,<br>Heilongjiang | 0 | 0 | 0 | 0 | 0.999 | 0 | 0 | 0 | Sub-pop 5 |
| H18412 | 龙粳 17   | Longjing17    | Haerbin,<br>Heilongjiang | 0 | 0 | 0 | 0 | 0.999 | 0 | 0 | 0 | Sub-pop 5 |
| H18413 | 龙粳 16   | Longjing16    | Haerbin,<br>Heilongjiang | 0 | 0 | 0 | 0 | 0.999 | 0 | 0 | 0 | Sub-pop 5 |
| H18414 | 龙粳 15   | Longjing15    | Haerbin,<br>Heilongjiang | 0 | 0 | 0 | 0 | 0.999 | 0 | 0 | 0 | Sub-pop 5 |
| H18415 | 中龙稻 1 号 | Zhonglongdao1 | Haerbin,<br>Heilongjiang | 0 | 0 | 0 | 0 | 0.999 | 0 | 0 | 0 | Sub-pop 5 |
| H18416 | 龙稻 8 号  | Zongdao8      | Haerbin,<br>Heilongjiang | 0 | 0 | 0 | 0 | 0.999 | 0 | 0 | 0 | Sub-pop 5 |
| H18417 | 龙稻 6 号  | Longdao6      | Haerbin,<br>Heilongjiang | 0 | 0 | 0 | 0 | 0.999 | 0 | 0 | 0 | Sub-pop 5 |
| H18418 | 龙稻 5 号  | Longdao5      | Haerbin,<br>Heilongjiang | 0 | 0 | 0 | 0 | 0.999 | 0 | 0 | 0 | Sub-pop 5 |
| H18419 | 龙稻 4 号  | Longdao4      | Haerbin,<br>Heilongjiang | 0 | 0 | 0 | 0 | 0.999 | 0 | 0 | 0 | Sub-pop 5 |
| H18420 | 垦稻 19   | Kendao19      | Haerbin,<br>Heilongjiang | 0 | 0 | 0 | 0 | 0.999 | 0 | 0 | 0 | Sub-pop 5 |

|        |         |              |                          |       |       |       |   |       |       |       |       |           |
|--------|---------|--------------|--------------------------|-------|-------|-------|---|-------|-------|-------|-------|-----------|
| H18421 | 垦稻 18   | Kendao18     | Haerbin,<br>Heilongjiang | 0     | 0     | 0     | 0 | 0.999 | 0     | 0     | 0     | Sub-pop 5 |
| H18422 | 垦稻 12   | Kendao12     | Haerbin,<br>Heilongjiang | 0     | 0     | 0     | 0 | 0.999 | 0     | 0     | 0     | Sub-pop 5 |
| H18423 | 垦稻 13   | Kendao13     | Haerbin,<br>Heilongjiang | 0     | 0     | 0     | 0 | 0.999 | 0     | 0     | 0     | Sub-pop 5 |
| H18424 | 垦稻 20   | Kendao20     | Haerbin,<br>Heilongjiang | 0     | 0     | 0     | 0 | 0.999 | 0     | 0     | 0     | Sub-pop 5 |
| H18425 | 龙盾 106  | Longdun106   | Haerbin,<br>Heilongjiang | 0     | 0     | 0     | 0 | 0.999 | 0     | 0     | 0     | Sub-pop 5 |
| H18426 | 龙盾 105  | Longdun105   | Haerbin,<br>Heilongjiang | 0     | 0     | 0     | 0 | 0.999 | 0     | 0     | 0     | Sub-pop 5 |
| H18427 | 三江 2 号  | Sanjiang2    | Haerbin,<br>Heilongjiang | 0     | 0     | 0     | 0 | 0.999 | 0     | 0     | 0     | Sub-pop 5 |
| H18428 | 农香 21   | Nongxiang21  | Changsha, Hunan          | 0     | 0     | 0     | 0 | 0.999 | 0     | 0     | 0     | Sub-pop 5 |
| H18429 | 农香 25   | Nongxiang25  | Changsha, Hunan          | 0     | 0     | 0     | 0 | 0.999 | 0     | 0     | 0     | Sub-pop 5 |
| H18430 | 农香 26   | Nongxiang26  | Changsha, Hunan          | 0.001 | 0.001 | 0.002 | 0 | 0.985 | 0.009 | 0.001 | 0.001 | Sub-pop 5 |
| H18431 | 玉针香     | Yuzhenxiang  | Changsha, Hunan          | 0     | 0     | 0     | 0 | 0.999 | 0     | 0     | 0     | Sub-pop 5 |
| H18432 | 黄华占     | Huanghuazhan | Changsha, Hunan          | 0     | 0     | 0     | 0 | 0.999 | 0     | 0     | 0     | Sub-pop 5 |
| H18433 | 丰优晚 8 号 | Fengyouwan8  | Changsha, Hunan          | 0     | 0     | 0     | 0 | 0.999 | 0     | 0     | 0     | Sub-pop 5 |
| H18434 | 日本晴     | Ribenqing    | Haerbin,<br>Heilongjiang | 0     | 0     | 0     | 0 | 0.999 | 0     | 0     | 0     | Sub-pop 5 |







|        |         |                |                          |       |   |       |       |       |       |       |       |       |           |
|--------|---------|----------------|--------------------------|-------|---|-------|-------|-------|-------|-------|-------|-------|-----------|
| H18488 | 宁粳恢 260 | Ningjinghui260 | Nanjing, Jiangsu         | 1     | 0 | 0     | 0     | 0     | 0     | 0     | 0     | 0     | Sub-pop 1 |
| H18489 | 宁粳恢 285 | Ningjinghui285 | Nanjing, Jiangsu         | 1     | 0 | 0     | 0     | 0     | 0     | 0     | 0     | 0     | Sub-pop 1 |
| H18490 | 宁粳恢 286 | Ningjinghui286 | Nanjing, Jiangsu         | 1     | 0 | 0     | 0     | 0     | 0     | 0     | 0     | 0     | Sub-pop 1 |
| H18491 | 宁粳恢 290 | Ningjinghui290 | Nanjing, Jiangsu         | 1     | 0 | 0     | 0     | 0     | 0     | 0     | 0     | 0     | Sub-pop 1 |
| H18492 | 宁粳恢 292 | Ningjinghui292 | Nanjing, Jiangsu         | 0.999 | 0 | 0     | 0     | 0     | 0     | 0     | 0     | 0     | Sub-pop 1 |
| H18493 | 宁粳恢 293 | Ningjinghui293 | Nanjing, Jiangsu         | 0.999 | 0 | 0     | 0     | 0     | 0     | 0     | 0     | 0     | Sub-pop 1 |
| H18494 | 宁粳恢 296 | Ningjinghui296 | Nanjing, Jiangsu         | 0.999 | 0 | 0     | 0     | 0     | 0     | 0     | 0     | 0     | Sub-pop 1 |
| H18495 | 宁粳恢 298 | Ningjinghui298 | Nanjing, Jiangsu         | 0.999 | 0 | 0     | 0     | 0     | 0     | 0     | 0     | 0     | Sub-pop 1 |
| H18496 | 宁粳恢 338 | Ningjinghui338 | Nanjing, Jiangsu         | 0.999 | 0 | 0     | 0     | 0     | 0     | 0     | 0     | 0     | Sub-pop 1 |
| H18497 | 洪引 1009 | Hongyin1009    | Nanjing, Jiangsu         | 0.999 | 0 | 0     | 0     | 0     | 0     | 0     | 0     | 0     | Sub-pop 1 |
| H18498 | 洪引 1010 | Hongyin1010    | Nanjing, Jiangsu         | 0.999 | 0 | 0     | 0     | 0     | 0     | 0     | 0     | 0     | Sub-pop 1 |
| H18499 | 洪引 1011 | Hongyin1011    | Nanjing, Jiangsu         | 0.999 | 0 | 0     | 0     | 0     | 0     | 0     | 0     | 0     | Sub-pop 1 |
| H18500 | 洪引 1012 | Hongyin1012    | Nanjing, Jiangsu         | 0.999 | 0 | 0     | 0     | 0     | 0     | 0     | 0     | 0     | Sub-pop 1 |
| H18501 | 彩       | Cai1           | Haerbin,<br>Heilongjiang | 0.999 | 0 | 0     | 0     | 0     | 0     | 0     | 0     | 0     | Sub-pop 1 |
| H18502 | 南农粳 1R  | Nannongjing1R  | Nanjing, Jiangsu         | 0.999 | 0 | 0     | 0     | 0     | 0     | 0     | 0     | 0     | Sub-pop 1 |
| H18503 | 南农粳 2R  | Nannongjing2R  | Nanjing, Jiangsu         | 0.976 | 0 | 0.001 | 0     | 0     | 0.021 | 0.002 | 0     | 0     | Sub-pop 1 |
| H18504 | 南农粳 3R  | Nannongjing3R  | Nanjing, Jiangsu         | 0.992 | 0 | 0.001 | 0.001 | 0.001 | 0.002 | 0.001 | 0.001 | 0.001 | Sub-pop 1 |

---



**Table S3.** Analysis of molecular variance (AMOVA) for the 8 subpopulations of rice varieties.

| Source of variation | df  | Sum of squares | Variance components | Percentage of variation | P Value |
|---------------------|-----|----------------|---------------------|-------------------------|---------|
| Among populations   | 8   | 20750.989      | 49.85622 Va         | 48.21                   | P<0.01  |
| Within populations  | 466 | 24960.277      | 53.56283 Vb         | 51.79                   | P<0.01  |
| Total               | 474 | 45711.266      | 103.41905           |                         |         |

**Table S4.** Pairwise population differentiation according to groups of populations as measured by  $F_{st}$  values using Arlequin software ver. 3.5 .

| Subpopulation | Sub-pop 1 | Sub-pop 2 | Sub-pop 3 | Sub-pop 4 | Sub-pop 5 | Sub-pop 6 | Sub-pop 7 | Sub-pop 8 |
|---------------|-----------|-----------|-----------|-----------|-----------|-----------|-----------|-----------|
| Sub-pop 1     | -         | 0.71      | 0.66      | 0.75      | 0.65      | 0.69      | 0.67      | 0.68      |
| Sub-pop 2     | 0.52      | -         | 0.48      | 0.68      | 0.57      | 0.64      | 0.58      | 0.63      |
| Sub-pop 3     | 0.45      | 0.44      | -         | 0.58      | 0.55      | 0.54      | 0.56      | 0.60      |
| Sub-pop 4     | 0.47      | 0.57      | 0.45      | -         | 0.66      | 0.57      | 0.70      | 0.70      |
| Sub-pop 5     | 0.44      | 0.48      | 0.41      | 0.48      | -         | 0.62      | 0.59      | 0.52      |
| Sub-pop 6     | 0.47      | 0.52      | 0.42      | 0.45      | 0.45      | -         | 0.65      | 0.65      |
| Sub-pop 7     | 0.51      | 0.59      | 0.48      | 0.59      | 0.50      | 0.53      | -         | 0.53      |
| Sub-pop 8     | 0.48      | 0.59      | 0.48      | 0.55      | 0.44      | 0.51      | 0.56      | -         |

Nei's genetic distances appear above the diagonal and Pairwise  $F_{st}$  values appear below the diagonal. All  $F_{st}$  values are significant ( $P < 0.01$ ).

**Table S5.** Comparison of  $D'$  values of LD for pairwise loci in each subpopulation.

| Sub<br>populations | Number of<br>significant<br>LD locus<br>pairs <sup>a</sup> | Number of<br>significant LD<br>locus pairs/Total<br>number of locus<br>pairs (%) <sup>b</sup> | Frequency of $D'$ value ( $P<0.05$ ) |          |          |          |          | Mean<br>of $D'$ <sup>c</sup> |
|--------------------|------------------------------------------------------------|-----------------------------------------------------------------------------------------------|--------------------------------------|----------|----------|----------|----------|------------------------------|
|                    |                                                            |                                                                                               | 0-0.2                                | 0.21-0.4 | 0.41-0.6 | 0.61-0.8 | 0.81-1.0 |                              |
| Sub-pop 1          | 1723                                                       | 8.21                                                                                          | 0                                    | 185      | 602      | 530      | 405      | 0.653                        |
| Sub-pop 2          | 439                                                        | 3.74                                                                                          | 0                                    | 23       | 131      | 141      | 144      | 0.705                        |
| Sub-pop 3          | 1425                                                       | 8.63                                                                                          | 5                                    | 149      | 323      | 451      | 497      | 0.696                        |
| Sub-pop 4          | 1180                                                       | 8.06                                                                                          | 0                                    | 28       | 176      | 280      | 696      | 0.814                        |
| Sub-pop 5          | 1434                                                       | 8.83                                                                                          | 1                                    | 120      | 307      | 337      | 669      | 0.742                        |
| Sub-pop 6          | 1215                                                       | 8.4                                                                                           | 15                                   | 256      | 307      | 274      | 363      | 0.639                        |
| Sub-pop 7          | 409                                                        | 3.08                                                                                          | 1                                    | 50       | 135      | 90       | 133      | 0.675                        |
| Sub-pop 8          | 1728                                                       | 8.25                                                                                          | 0                                    | 189      | 601      | 533      | 405      | 0.653                        |
|                    | 9553                                                       |                                                                                               |                                      |          |          |          |          |                              |

<sup>a</sup> LD means linkage disequilibrium.

<sup>b</sup> Ratio between the number of significant LD locus pairs and total number of locus pairs.

<sup>c</sup>  $D'$  means standardized disequilibrium coefficients.

**Table S6.** Marker–trait associations with *P* value <0.05, their equivalent false discovery rate probability (FDR), proportion of phenotypic variance explained (PVE), marker position on chromosome derived from 262 markers and 474 rice accessions for PH.

| Traits | Year | SSR<br>Marker | Chromosome | Position<br>(cM) <sup>a</sup> | Position (bp) <sup>b</sup> |          | P value  | PVE (%) | FDR      |
|--------|------|---------------|------------|-------------------------------|----------------------------|----------|----------|---------|----------|
|        |      |               |            |                               | Start pos                  | End pos  |          |         |          |
| PH     | 2018 | RM1240        | 11         | 6.5                           | 1660893                    | 1660932  | 3.61E-05 | 10.31   | 3.13E-03 |
|        |      | RM324         | 2          | 51.1                          | 11388913                   | 11388939 | 1.75E-02 | 2.93    | 1.88E-02 |
|        |      | RM6215        | 8          | 66.8                          | 19058582                   | 19058608 | 1.85E-02 | 4.9     | 2.19E-02 |
|        |      | RM249         | 5          | 50.2                          | 10776494                   | 10776621 | 1.95E-02 | 3.9     | 2.50E-02 |
|        |      | RM161         | 5          | 96.9                          |                            |          | 2.10E-02 | 6.92    | 3.13E-02 |
|        |      | RM3330        | 6          | 61.6                          | 10907997                   | 10908028 | 2.94E-02 | 5.48    | 3.44E-02 |
|        |      | RM265         | 1          | 153.5                         | 35196573                   | 35196681 | 3.57E-02 | 3.53    | 3.75E-02 |
|        |      | RM3589        | 7          | 89.8                          | 25054610                   | 25054631 | 3.71E-02 | 5.01    | 4.06E-02 |
|        |      | RM7309        | 6          | 100.3                         | 25914707                   | 25914734 | 4.08E-02 | 5.51    | 4.38E-02 |
|        |      | RM454         | 6          | 99.3                          |                            |          | 4.50E-02 | 2.07    | 4.69E-02 |
|        | 2019 | RM524         | 9          | 42.5                          | 12871621                   | 12871642 | 5.11E-03 | 6.41    | 1.18E-02 |
|        |      | RM234         | 7          | 93.9                          | 25420132                   | 25420157 | 5.00E-02 | 5.06    | 5.00E-02 |

<sup>a</sup> The estimated map position (cM) and <sup>b</sup> physical position (bp) was inferred the Gremene (["http://www.gramene.org/markers"](http://www.gramene.org/markers)) and NCBI (["http://blast.ncbi.nlm.nih.gov/Blast.cgi"](http://blast.ncbi.nlm.nih.gov/Blast.cgi)).

**Table S7.** Marker–trait associations with *P* value <0.05, their equivalent false discovery rate probability (FDR), proportion of phenotypic variance explained (PVE), marker position on chromosome derived from 262 markers and 474 rice accessions for PL.

| Traits | Year | SSR<br>Marker | Chromosome | Position<br>(cM) <sup>a</sup> | Position (bp) <sup>b</sup> |          | P value  | PVE (%) | FDR      |
|--------|------|---------------|------------|-------------------------------|----------------------------|----------|----------|---------|----------|
|        |      |               |            |                               | Start pos                  | End pos  |          |         |          |
| PL     | 2018 | RM8243        | 8          | 50.8                          | 8930116                    | 8930137  | 6.11E-03 | 5.63    | 1.18E-02 |
|        |      | RM24481       | 9          | 63                            | 17210236                   | 17210327 | 9.18E-03 | 7.88    | 1.76E-02 |
|        |      | RM249         | 5          | 50.2                          | 10776494                   | 10776621 | 1.42E-02 | 4.1     | 2.65E-02 |
|        |      | RM7598        | 2          | 126.4                         | 29846409                   | 29846432 | 2.76E-02 | 3.37    | 3.24E-02 |
|        |      | RM598         | 5          | 62.7                          | 16676126                   | 16676152 | 3.03E-02 | 2.98    | 3.53E-02 |
|        |      | RM434         | 9          | 57.7                          | 15609041                   | 15609064 | 3.12E-02 | 3.93    | 3.82E-02 |
|        |      | RM3331        | 12         | 89.5                          | 23528087                   | 23528116 | 3.23E-02 | 3.59    | 4.41E-02 |
|        |      | RM410         | 9          | 79.3                          | 514907                     | 514934   | 3.43E-02 | 3.87    | 5.00E-02 |
|        | 2019 | RM7545        | 10         | 7.6                           | 3785115                    | 3785186  | 9.12E-03 | 9.67    | 2.06E-02 |
|        |      | RM1108        | 10         | 55.3                          | 18716363                   | 18716386 | 1.59E-02 | 3.34    | 2.35E-02 |
|        |      | RM1231        | 1          | 98.5                          | 29472375                   | 29472404 | 2.25E-02 | 6.28    | 2.65E-02 |
|        |      | RM159         | 5          | 5.4                           | 488027                     | 488281   | 3.15E-02 | 5.43    | 4.12E-02 |
|        |      | RM512         | 12         | 39.4                          | 5104402                    | 5104421  | 3.44E-02 | 2.57    | 4.41E-02 |
|        |      | RM171         | 10         | 73                            | 19048795                   | 19049123 | 3.96E-02 | 2.14    | 4.71E-02 |
|        |      | RM25          | 8          | 52.2                          |                            |          | 4.55E-02 | 4.57    | 5.00E-02 |

<sup>a</sup> The estimated map position (cM) and <sup>b</sup> physical position (bp) was inferred the Gremene (["http://www.gramene.org/markers"](http://www.gramene.org/markers)) and NCBI (["http://blast.ncbi.nlm.nih.gov/Blast.cgi"](http://blast.ncbi.nlm.nih.gov/Blast.cgi)).

**Table S8.** Marker–trait associations with *P* value <0.05, their equivalent false discovery rate probability (FDR), proportion of phenotypic variance explained (PVE), marker position on chromosome derived from 262 markers and 474 rice accessions for 1IN.

| Traits | Year | SSR<br>Marker | Chromosome | Position<br>(cM) <sup>a</sup> | Position (bp) <sup>b</sup> |          | P value  | PVE (%) | FDR      |
|--------|------|---------------|------------|-------------------------------|----------------------------|----------|----------|---------|----------|
|        |      |               |            |                               | Start pos                  | End pos  |          |         |          |
| 1IN    | 2018 | RM471         | 4          | 53.8                          | 19007714                   | 19007737 | 1.54E-02 | 4.38    | 1.67E-02 |
|        |      | RM6976        | 8          | 92.2                          | 23551198                   | 23551242 | 1.55E-02 | 7.45    | 2.50E-02 |
|        |      | RM437         | 5          | 31.5                          | 3815948                    | 3815973  | 4.83E-02 | 1.29    | 5.00E-02 |
|        | 2019 | RM348         | 4          | 160.8                         | 32869438                   | 32869458 | 8.89E-04 | 4.47    | 1.00E-02 |
|        |      | RM122         | 5          | 3                             | 279748                     | 279775   | 2.73E-03 | 3.9     | 1.50E-02 |
|        |      | RM4835        | 4          | 18.3                          | 19135687                   | 19135792 | 6.25E-03 | 4.93    | 2.00E-02 |
|        |      | RM72          | 8          | 60.9                          |                            |          | 1.69E-02 | 5.89    | 2.50E-02 |
|        |      | RM512         | 12         | 39.4                          | 5104402                    | 5104421  | 2.29E-02 | 2.78    | 4.00E-02 |
|        |      | RM5746        | 12         | 39.4                          | 5092032                    | 5092055  | 2.48E-02 | 6.19    | 4.50E-02 |
|        |      | RM171         | 10         | 73                            | 23072213                   | 23072266 | 4.10E-02 | 2.12    | 5.00E-02 |

<sup>a</sup> The estimated map position (cM) and <sup>b</sup> physical position (bp) was inferred the Gremene (["http://www.gramene.org/markers"](http://www.gramene.org/markers)) and NCBI (["http://blast.ncbi.nlm.nih.gov/Blast.cgi"](http://blast.ncbi.nlm.nih.gov/Blast.cgi)).

**Table S9.** Marker–trait associations with *P* value <0.05, their equivalent false discovery rate probability (FDR), proportion of phenotypic variance explained (PVE), marker position on chromosome derived from 262 markers and 474 rice accessions for 2IN.

| Traits | Year | SSR<br>Marker | Chromosome | Position<br>(cM) <sup>a</sup> | Position (bp) <sup>b</sup> |          | P value  | PVE (%) | FDR      |
|--------|------|---------------|------------|-------------------------------|----------------------------|----------|----------|---------|----------|
|        |      |               |            |                               | Start pos                  | End pos  |          |         |          |
| 2IN    | 2018 | RM264         | 8          | 138.2                         |                            |          | 8.97E-03 | 5.71    | 2.73E-02 |
|        |      | RM5479        | 12         | 95.4                          | 24446205                   | 24446246 | 1.20E-02 | 6.75    | 3.64E-02 |
|        |      | RM345         | 6          | 123.9                         | 30864845                   | 30864999 | 3.30E-02 | 2.93    | 4.09E-02 |
|        |      | RM218         | 3          | 67.8                          | 8375236                    | 8375283  | 3.50E-02 | 3.85    | 4.55E-02 |
|        |      | RM1-003       | 1          | 194                           |                            |          | 3.50E-02 | 4.46    | 5.00E-02 |
|        | 2019 | RM450         | 2          | 122.8                         | 28652656                   | 28652689 | 1.44E-02 | 3.75    | 2.27E-02 |
|        |      | RM161         | 5          | 96.9                          |                            |          | 2.48E-02 | 6.78    | 3.64E-02 |
|        |      | RM583         | 1          | 38.8                          | 8328958                    | 8329017  | 2.83E-02 | 3.02    | 4.09E-02 |
|        |      | RM244         | 10         | 15                            |                            |          | 2.85E-02 | 3.01    | 4.55E-02 |
|        |      | RM1108        | 10         | 55.3                          | 18716363                   | 18716386 | 4.82E-02 | 2.71    | 5.00E-02 |

<sup>a</sup> The estimated map position (cM) and <sup>b</sup> physical position (bp) was inferred the Gremene (["http://www.gramene.org/markers"](http://www.gramene.org/markers)) and NCBI (["http://blast.ncbi.nlm.nih.gov/Blast.cgi"](http://blast.ncbi.nlm.nih.gov/Blast.cgi)).

**Table S10.** Marker–trait associations with  $P$  value  $<0.05$ , their equivalent false discovery rate probability (FDR), proportion of phenotypic variance explained (PVE), marker position on chromosome derived from 262 markers and 474 rice accessions for 3IN.

| Traits | Year | SSR<br>Marker | Chromosome | Position<br>(cM) <sup>a</sup> | Position (bp) <sup>b</sup> |          | P value  | PVE (%) | FDR      |
|--------|------|---------------|------------|-------------------------------|----------------------------|----------|----------|---------|----------|
|        |      |               |            |                               | Start pos                  | End pos  |          |         |          |
| 3IN    | 2018 | RM7345        | 3          | 48.8                          | 10958945                   | 10958968 | 1.47E-03 | 5.04    | 7.14E-03 |
|        |      | RM11          | 7          | 93.8                          | 19204350                   | 19204379 | 9.26E-03 | 4.36    | 2.14E-02 |
|        |      | RM1108        | 10         | 55.3                          | 18716363                   | 18716386 | 1.99E-02 | 3.22    | 3.21E-02 |
|        |      | RM463         | 12         | 75.5                          | 22159508                   | 22159527 | 2.04E-02 | 3.55    | 3.57E-02 |
|        |      | RM598         | 5          | 62.7                          | 16676126                   | 16676152 | 2.33E-02 | 3.13    | 3.93E-02 |
|        |      | RM6863        | 8          | 16.4                          | 2005990                    | 2006016  | 3.99E-02 | 4.37    | 5.00E-02 |
|        | 2019 | RM1313        | 2          | 51.1                          | 11262096                   | 11262133 | 1.83E-02 | 4.59    | 2.31E-02 |
|        |      | RM5479        | 12         | 95.4                          | 24446205                   | 24446246 | 1.85E-02 | 6.43    | 2.69E-02 |
|        |      | RM258         | 10         | 48.8                          | 17570591                   | 17570612 | 2.42E-02 | 3.77    | 3.08E-02 |
|        |      | RM168         | 3          | 122.8                         | 27898585                   | 27898604 | 4.19E-02 | 4.33    | 4.62E-02 |

<sup>a</sup> The estimated map position (cM) and <sup>b</sup> physical position (bp) was inferred the Gremene (["http://www.gramene.org/markers"](http://www.gramene.org/markers)) and NCBI (["http://blast.ncbi.nlm.nih.gov/Blast.cgi"](http://blast.ncbi.nlm.nih.gov/Blast.cgi)).



**Table S11.** Marker–trait associations with *P* value <0.05, their equivalent false discovery rate probability (FDR), proportion of phenotypic variance explained (PVE), marker position on chromosome derived from 262 markers and 474 rice accessions for 4IN.

| Traits | Year | SSR<br>Marker | Chromosome | Position<br>(cM) <sup>a</sup> | Position (bp) <sup>b</sup> |          | P value  | PVE (%) | FDR      |
|--------|------|---------------|------------|-------------------------------|----------------------------|----------|----------|---------|----------|
|        |      |               |            |                               | Start pos                  | End pos  |          |         |          |
| 4IN    | 2018 | RM1246        | 12         | 65.3                          | 19156149                   | 19156178 | 7.51E-03 | 4.83    | 2.06E-02 |
|        |      | RM8239        | 6          | 91.9                          | 24555002                   | 24555027 | 1.33E-02 | 3.08    | 2.35E-02 |
|        |      | RM5           | 1          | 93                            | 23968577                   | 23968606 | 2.00E-02 | 4.21    | 2.94E-02 |
|        |      | RM324         | 2          | 51.1                          | 11388913                   | 11388939 | 2.28E-02 | 2.79    | 3.24E-02 |
|        |      | RM524         | 9          | 42.5                          | 12871621                   | 12871642 | 3.88E-02 | 4.98    | 4.12E-02 |
|        |      | RM6215        | 8          | 66.8                          | 19058582                   | 19058608 | 4.64E-02 | 4.26    | 1.98E-01 |
|        |      | RM7563        | 4          | 68.3                          | 22848896                   | 22848923 | 4.75E-02 | 3.34    | 1.59E-01 |
|        | 2019 | RM161         | 5          | 96.9                          |                            |          | 1.09E-02 | 7.44    | 1.67E-02 |
|        |      | RM5475        | 3          | 137.9                         | 30376088                   | 30376129 | 1.42E-02 | 6.93    | 2.00E-02 |
|        |      | RM5849        | 3          | 18.4                          | 4237901                    | 4237978  | 2.81E-02 | 5.81    | 3.67E-02 |
|        |      | RM188         | 5          | 95.3                          | 21994619                   | 21994639 | 3.14E-02 | 4.84    | 4.00E-02 |
|        |      | RM5479        | 12         | 95.4                          | 24446205                   | 24446246 | 0.043126 | 5.75    | 4.67E-02 |

<sup>a</sup> The estimated map position (cM) and <sup>b</sup> physical position (bp) was inferred the Gremene (["http://www.gramene.org/markers"](http://www.gramene.org/markers)) and NCBI (["http://blast.ncbi.nlm.nih.gov/Blast.cgi"](http://blast.ncbi.nlm.nih.gov/Blast.cgi)).

**Table S12.** Phenotypic effect of top two negative favorable alleles for PH, 2IN, 3IN, 4IN and top two positive favorable alleles significantly associated with PL and 1IN and their carrier varieties.

| Trait | Locus-alleles | Phenotypic effect value |        | Mean   | P value and its significance of F test of ANOVA for each locus | Carrier variety |
|-------|---------------|-------------------------|--------|--------|----------------------------------------------------------------|-----------------|
|       |               | 2018                    | 2019   |        |                                                                |                 |
| PH    | RM301-145     | -14.57                  | -15.41 | -14.99 | 0.000151 ***                                                   | Huaidao9        |
|       | RM301-150     | -24.62                  | -23.48 | -24.05 |                                                                | Youmang429      |
|       | RM301-160     | -8.70                   | -8.59  | -8.65  |                                                                | Maoguangdao     |
|       | RM301-170     | -21.81                  | -23.71 | -22.76 | 0.000186 ***                                                   | Nongxiang26     |
|       | RM348-130     | -33.05                  | -33.33 | -33.19 |                                                                | Yue2            |
|       | RM348-155     | -22.58                  | -22.65 | -22.62 |                                                                | Cai1            |
|       | RM305-195     | -38.06                  | -38.11 | -38.08 | 0.0000000279 ****                                              | Tiejingqing     |
|       | RM305-205     | -41.16                  | -41.61 | -41.39 |                                                                | Xiaomandao      |
|       | RM305-210     | -51.71                  | -51.13 | -51.42 |                                                                | Maoguangdao     |
|       | RM305-215     | -37.09                  | -37.13 | -37.11 |                                                                | Huaidao9        |
|       | RM305-270     | -41.79                  | -41.29 | -41.54 |                                                                | Yue9            |
|       | RM305-370     | -43.43                  | -43.20 | -43.31 |                                                                | Yue4            |
|       | RM264-150     | -32.28                  | -33.76 | -33.02 |                                                                | Nannongjing2R   |
|       | RM264-155     | -28.75                  | -28.09 | -28.42 |                                                                | Wandao68        |
|       | RM264-165     | -24.79                  | -23.36 | -24.08 | 0.000000101 ****                                               | Sanjiang2       |
|       | RM264-170     | -22.37                  | -21.25 | -21.81 |                                                                | Nannongjing1R   |
|       | RM264-180     | -3.51                   | -4.72  | -4.12  |                                                                | Yue30           |
|       | RM264-185     | -13.61                  | -13.79 | -13.70 | 0.000871 ***                                                   | Huaidao9        |
|       | RM264-190     | -23.29                  | -25.18 | -24.24 |                                                                | Yue14           |
|       | RM512-115     | -21.61                  | -23.01 | -22.31 |                                                                | Fuxiang1        |
|       | RM512-130     | -5.83                   | -3.75  | -4.79  |                                                                | Yue4            |
|       | RM512-220     | -24.72                  | -23.29 | -24.00 |                                                                | Youmang429      |
| PL    | RM1-100       | 4.79                    | 4.62   | 4.70   | 0.00449 **                                                     | Yue38           |
|       | RM1-360       | 2.42                    | 2.98   | 2.70   |                                                                | Yue96           |
|       | RM1-80        | 5.61                    | 5.28   | 5.45   |                                                                | Yue30           |
|       | RM583-180     | 3.41                    | 3.08   | 3.24   | ns                                                             | Yue96           |
|       | RM583-185     | 3.95                    | 2.84   | 3.40   |                                                                | Yue10           |
|       | RM338-135     | 2.99                    | 2.91   | 2.95   |                                                                | Yue96           |
|       | RM338-150     | 1.11                    | 1.00   | 1.06   | 0.000161 ****                                                  | Sanjiang2       |
|       | RM338-160     | 5.68                    | 5.39   | 5.53   |                                                                | Yue26           |
|       | RM338-175     | 5.27                    | 5.51   | 5.39   |                                                                | Yue38           |
|       | RM122-160     | 6.79                    | 6.13   | 6.46   | 0.000629 ***                                                   | Yue6            |
|       | RM122-180     | 4.75                    | 4.16   | 4.46   |                                                                | Yue2            |
|       | RM122-235     | 1.91                    | 1.51   | 1.71   |                                                                | Yue96           |
|       | RM122-270     | 2.88                    | 2.75   | 2.81   |                                                                | Yue10           |

|     |            |       |       |       |                   |                    |
|-----|------------|-------|-------|-------|-------------------|--------------------|
|     | RM3330-110 | 3.09  | 3.80  | 3.44  |                   | Yue63              |
|     | RM3330-120 | 3.39  | 3.51  | 3.45  | 0.00231 **        | Yue38              |
|     | RM3330-135 | 7.20  | 7.69  | 7.44  |                   | Yue96              |
|     | RM5380-115 | 8.58  | 7.98  | 8.28  |                   | Yue85              |
|     | RM5380-120 | 1.44  | 1.14  | 1.29  | 0.000130 ***      | Yangmiaozhong      |
|     | RM5380-130 | 2.09  | 2.59  | 2.34  |                   | Yue68              |
|     | RM5380-90  | 3.76  | 3.25  | 3.51  |                   | Fuxiang1           |
|     | RM3533-125 | 1.99  | 1.52  | 1.76  |                   | Yue96              |
|     | RM3533-190 | 5.50  | 5.58  | 5.54  | 0.0000231 ****    | Yue38              |
|     | RM3533-220 | 9.56  | 9.31  | 9.44  |                   | Yue63              |
|     | RM3533-275 | 2.54  | 2.05  | 2.30  |                   | Muzhan4            |
|     | RM3600-125 | 2.30  | 2.71  | 2.50  |                   | Yue76              |
|     | RM3600-130 | 3.81  | 6.78  | 5.30  |                   | Yue38              |
|     | RM3600-140 | 4.58  | 4.76  | 4.67  | 0.0342 *          | Yue46              |
|     | RM3600-170 | 3.58  | 3.22  | 3.40  |                   | Yue58              |
|     | RM3600-180 | 3.10  | 3.75  | 3.42  |                   | Yue96              |
|     | RM3600-85  | 1.44  | 1.10  | 1.27  |                   | Qiutiandaxiedao    |
|     | RM6160-160 | 5.27  | 5.07  | 5.17  |                   | Hongyin1009        |
|     | RM6160-170 | 3.52  | 3.29  | 3.41  | 0.00011 ***       | Yue96              |
|     | RM6160-180 | 4.21  | 4.00  | 4.11  |                   | Yue30              |
|     | RM6160-200 | 2.12  | 2.22  | 2.17  |                   | Yue12              |
| 1IN | RM301-130  | 5.85  | 5.93  | 5.89  |                   | Qiyunuo10          |
|     | RM301-140  | 0.50  | 0.96  | 0.73  | 0.0000366 ****    | Yue4               |
|     | RM301-155  | 4.99  | 4.80  | 4.89  |                   | Yue119             |
|     | RM301-180  | 3.69  | 3.80  | 3.75  |                   | Yue24              |
|     | RM264-120  | 10.58 | 10.25 | 10.42 |                   | Heizhong           |
|     | RM264-130  | 5.55  | 5.80  | 5.67  |                   | Qiyunuo10          |
|     | RM264-140  | 4.17  | 4.75  | 4.46  | 0.000000563 ****  | Yilimang           |
|     | RM264-160  | 2.88  | 2.59  | 2.74  |                   | Yue36              |
|     | RM264-180  | 1.59  | 1.26  | 1.42  |                   | Yue119             |
|     | RM264-195  | 5.46  | 5.07  | 5.26  |                   | Erlibie            |
|     | RM257-125  | 9.41  | 9.84  | 9.62  |                   | Huangkewanguangtou |
|     | RM257-130  | 3.05  | 3.26  | 3.15  |                   | Qiyunuo10          |
|     | RM257-140  | 0.36  | 0.14  | 0.25  | 0.0000000323 **** | Yue36              |
|     | RM257-165  | 1.82  | 1.81  | 1.81  |                   | Zacaodao           |
|     | RM257-180  | 5.55  | 5.81  | 5.68  |                   | Yue4               |
|     | RM257-190  | 6.52  | 6.29  | 6.40  |                   | Zhonghua3          |
| 2IN | RM301-145  | -1.04 | -1.19 | -1.12 |                   | Yandao6            |
|     | RM301-150  | -1.10 | -1.65 | -1.37 | ns                | Si4364             |
|     | RM301-160  | -2.08 | -2.48 | -2.28 |                   | Kendao12           |
|     | RM301-170  | -1.53 | -1.89 | -1.71 |                   | Zhendao10          |

|     |            |       |       |       |                 |                  |
|-----|------------|-------|-------|-------|-----------------|------------------|
|     | RM5427-115 | -1.45 | -1.40 | -1.42 |                 | Hongyin1010      |
|     | RM5427-120 | -0.60 | -0.71 | -0.65 |                 | Yangmiaozechong  |
|     | RM5427-125 | -2.68 | -3.52 | -3.10 |                 | Digudao          |
|     | RM5427-135 | -0.46 | -0.89 | -0.68 | 0.00037 ***     | Si4364           |
|     | RM5427-140 | -1.89 | -2.20 | -2.05 |                 | Hongyin1012      |
|     | RM5427-150 | -0.84 | -0.30 | -0.57 |                 | Kendao12         |
|     | RM5427-175 | -1.13 | -1.28 | -1.20 |                 | Zhonghua3        |
|     | RM5427-195 | -0.83 | -0.31 | -0.57 |                 | Yue11            |
|     | RM348-130  | -7.64 | -7.32 | -7.48 |                 | Zhonghua3        |
|     | RM348-135  | -0.33 | -0.58 | -0.46 | 0.0000675 ****  | Yangmiaozechong  |
|     | RM348-155  | -1.13 | -1.31 | -1.22 |                 | Si4364           |
|     | RM122-150  | -3.25 | -3.65 | -3.45 |                 | Zhonghua3        |
|     | RM122-160  | -1.48 | -1.46 | -1.47 |                 | Yue9             |
|     | RM122-180  | -1.99 | -1.58 | -1.78 | 0.000156 ***    | Yue3             |
|     | RM122-235  | -0.43 | -0.11 | -0.27 |                 | Kendao12         |
|     | RM122-240  | -0.30 | -0.54 | -0.42 |                 | Si4364           |
|     | RM305-195  | -1.34 | -1.61 | -1.47 |                 | Shengdao808      |
|     | RM305-210  | -1.09 | -1.78 | -1.44 | ns              | Kendao12         |
|     | RM305-370  | -2.51 | -2.43 | -2.47 |                 | Aijiaoluganhuang |
|     | RM512-115  | -5.50 | -5.60 | -5.55 |                 | Zhonghua3        |
|     | RM512-130  | -0.45 | -0.76 | -0.61 | 0.000492 ***    | Yue3             |
|     | RM512-220  | -1.11 | -1.61 | -1.36 |                 | Si4364           |
| 3IN | RM301-145  | -2.95 | -2.53 | -2.74 |                 | Cbao             |
|     | RM301-150  | -3.87 | -3.57 | -3.72 | 0.0085 **       | Digudao          |
|     | RM301-160  | -1.25 | -1.48 | -1.36 |                 | Longjing26       |
|     | RM301-170  | -2.77 | -3.52 | -3.15 |                 | Sujing353        |
|     | RM348-130  | -1.48 | -1.18 | -1.33 |                 | Zhonghua3        |
|     | RM348-135  | -2.09 | -2.03 | -2.06 | 0.00793 **      | Xudao3           |
|     | RM348-155  | -3.16 | -3.69 | -3.42 |                 | Digudao          |
|     | RM122-160  | -1.95 | -1.30 | -1.62 |                 | Yue6             |
|     | RM122-180  | -1.42 | -1.40 | -1.41 | ns              | Yue1             |
|     | RM305-195  | -3.56 | -3.40 | -3.48 |                 | Xudao3           |
|     | RM305-210  | -0.41 | -0.06 | -0.23 |                 | Longjing26       |
|     | RM305-215  | -3.54 | -3.40 | -3.47 | 0.00826 **      | Si4230           |
|     | RM305-370  | -1.69 | -0.17 | -0.93 |                 | Yue1             |
|     | RM3589-100 | -0.40 | -0.17 | -0.28 |                 | Yue1             |
|     | RM3589-110 | -3.19 | -3.02 | -3.10 |                 | Longjing26       |
|     | RM3589-115 | -1.40 | -1.89 | -1.65 |                 | Jindao12         |
|     | RM3589-140 | -2.32 | -2.17 | -2.25 |                 | Huizao           |
|     | RM3589-210 | -0.20 | -0.39 | -0.30 | 0.00000016 **** | Yue103           |
|     | RM3589-220 | -2.26 | -2.46 | -2.36 |                 | Yue78            |
|     | RM3589-240 | -3.77 | -3.73 | -3.75 |                 | Nannongjing3786  |
|     | RM3589-85  | -3.48 | -3.70 | -3.59 |                 | Cbao             |

|     |           |       |       |       |                |                     |
|-----|-----------|-------|-------|-------|----------------|---------------------|
|     | RM264-150 | -6.50 | -6.74 | -6.62 |                | Nannongjing2R       |
|     | RM264-155 | -3.39 | -4.20 | -3.79 |                | Shashani            |
|     | RM264-165 | -3.60 | -4.45 | -4.02 |                | Longjing26          |
|     | RM264-170 | -2.00 | -2.81 | -2.40 | 0.000372 ***   | Si4049              |
|     | RM264-180 | -1.02 | -1.75 | -1.39 |                | 24248               |
|     | RM264-185 | -2.32 | -2.38 | -2.35 |                | Cbao                |
|     | RM264-190 | -4.63 | -5.97 | -5.30 |                | Nannongjing3786     |
|     | RM247-135 | -1.02 | -1.53 | -1.27 |                | Nannongjing3786     |
|     | RM247-150 | -2.13 | -1.80 | -1.97 |                | Si4049              |
|     | RM247-165 | -7.63 | -7.02 | -7.33 | 0.0000795 **** | Baikenuo            |
|     | RM247-170 | -2.34 | -2.82 | -2.58 |                | Si4161              |
|     | RM247-185 | -4.67 | -4.07 | -4.37 |                | Digudao             |
|     | RM512-115 | -2.71 | -2.17 | -2.44 |                | Yue1                |
|     | RM512-220 | -3.92 | -3.63 | -3.78 | 0.0489*        | Digudao             |
| 4IN | RM301-145 | -3.25 | -3.13 | -3.19 |                | Nipponbare          |
|     | RM301-150 | -3.46 | -3.43 | -3.45 |                | Yue23               |
|     | RM301-160 | -1.17 | -0.97 | -1.07 | 0.000012 ****  | Longjing28          |
|     | RM301-170 | -4.66 | -4.78 | -4.72 |                | Sujing353           |
|     | RM348-35  | -1.03 | -2.11 | -1.57 |                | Yue68               |
|     | RM348-155 | -3.28 | -3.35 | -3.32 | ns             | Nannongjing1R       |
|     | RM122-180 | -2.64 | -2.97 | -2.81 |                | C418                |
|     | RM122-240 | -2.39 | -2.18 | -2.29 | ns             | Longjing26          |
|     | RM305-195 | -4.09 | -4.42 | -4.26 |                | Zhen9424            |
|     | RM305-205 | -0.19 | -0.08 | -0.14 |                | Nipponbare          |
|     | RM305-215 | -2.23 | -2.94 | -2.58 | 0.000944 ***   | Si4259              |
|     | RM305-370 | -1.36 | -0.84 | -1.10 |                | C418                |
|     | RM598-180 | -3.05 | -3.78 | -3.42 |                | Nipponbare          |
|     | RM225-115 | -1.87 | -2.77 | -2.32 |                | Nannongjing4004     |
|     | RM225-135 | -0.71 | -0.27 | -0.49 |                | Longjing26          |
|     | RM225-145 | -1.85 | -2.18 | -2.01 |                | Yue68               |
|     | RM225-155 | -1.60 | -2.10 | -1.85 | 0.000246 ***   | Hongnong5           |
|     | RM225-175 | -4.82 | -4.71 | -4.77 |                | Yandao6             |
|     | RM225-250 | -2.77 | -2.72 | -2.74 |                | Xudao5              |
|     | RM234-125 | -2.62 | -3.00 | -2.81 |                | Nannongjing2R       |
|     | RM234-130 | -1.93 | -1.96 | -1.95 |                | Longjing28          |
|     | RM234-140 | -2.51 | -2.65 | -2.58 |                | Ribenqing           |
|     | RM234-150 | -0.04 | -0.07 | -0.05 | 0.000001 ****  | Dongzhengwuyujing21 |
|     | RM234-155 | -5.18 | -5.07 | -5.13 |                | Qiuguang            |
|     | RM234-180 | -0.89 | -1.52 | -1.21 |                | Nannongjing4004     |
|     | RM234-200 | -4.11 | -4.45 | -4.28 |                | Sujing353           |
|     | RM264-150 | -7.26 | -7.12 | -7.19 |                | Nannongjing2R       |
|     | RM264-155 | -4.87 | -4.86 | -4.87 | 0.0000209 **** | Sujing353           |
|     | RM264-165 | -4.84 | -4.08 | -4.46 |                | Longjing28          |

|           |       |       |       |    |                 |
|-----------|-------|-------|-------|----|-----------------|
| RM264-170 | -3.23 | -2.79 | -3.01 |    | Hongyin1011     |
| RM264-180 | -2.96 | -2.01 | -2.49 |    | Yue49           |
| RM264-185 | -2.20 | -2.57 | -2.38 |    | Nipponbare      |
| RM264-190 | -5.84 | -5.92 | -5.88 |    | Nannongjing3786 |
| RM512-115 | -2.06 | -2.61 | -2.34 |    | C418            |
| RM512-220 | -3.42 | -3.36 | -3.39 | ns | Heimijingdao    |

---

*\*P* < 0.05, *\*\*P* < 0.01, *\*\*\*P* < 0.001, *\*\*\*\*P* < 0.0001, ns, not significant.

**Table S13.** Positive and negative elite alleles, phenotypic effect value and typical carrier materials.

| Traits | Locus-alleles | Phenotypic effect value |        | Mean  | Carrier variety |
|--------|---------------|-------------------------|--------|-------|-----------------|
|        |               | 2018                    | 2019   |       |                 |
| PH     | RM301-130     | 31.05                   | 31.01  | 31.03 | Qiyunuo10       |
|        | RM301-140     | 25.64                   | 25.36  | 25.5  | Buxienuo        |
|        | RM301-155     | 25.79                   | 25.93  | 25.86 | Xiaomandao      |
|        | RM301-180     | 24.09                   | 24.64  | 24.36 | Yue24           |
|        | RM348-135     | 24.9                    | 25.5   | 25.2  | Yue24           |
|        | RM348-145     | 43.28                   | 43.6   | 43.44 | Maoguangdao     |
|        | RM348-170     | 43.86                   | 43.31  | 43.58 | Yue4            |
|        | RM305-105     | 38.91                   | 38.67  | 38.79 | Buxienuo        |
|        | RM264-120     | 39.76                   | 39.2   | 39.48 | Heizhong        |
|        | RM264-130     | 32.38                   | 31.81  | 32.09 | Qiyunuo10       |
|        | RM264-140     | 31.1                    | 32.91  | 32.01 | Yilimang        |
|        | RM264-160     | 29.06                   | 29.29  | 29.17 | Maoguangdao     |
|        | RM264-195     | 28.52                   | 27.25  | 27.89 | Xiaomandao      |
|        | RM512-145     | 28.25                   | 27.86  | 28.05 | Buxienuo        |
|        | RM512-165     | 27.99                   | 26.15  | 27.07 | Maoguangdao     |
| PL     | RM1-105       | -0.27                   | -0.57  | -0.42 | Yue6            |
|        | RM1-110       | -0.34                   | -0.91  | -0.63 | Maoguangdao     |
|        | RM1-160       | -0.7                    | -0.72  | -0.71 | R254            |
|        | RM1-180       | -1.67                   | -1.65  | -1.66 | Qiyunuo10       |
|        | RM1-220       | -2.53                   | -2.95  | -2.74 | Nannongjing1R   |
|        | RM1-85        | -4.43                   | -4.74  | -4.59 | Si4081          |
|        | RM583-160     | -2.04                   | -1.78  | -1.91 | Wujing15        |
|        | RM583-175     | -0.09                   | -0.16  | -0.12 | Qiyunuo10       |
|        | RM583-190     | -3.04                   | -2.7   | -2.87 | Sanjiang2       |
|        | RM583-200     | -1.23                   | -0.93  | -1.08 | Cbao            |
|        | RM338-100     | -10.66                  | -10.55 | -10.6 | Datougui        |
|        | RM338-180     | -1.55                   | -1.36  | -1.46 | Yue30           |
|        | RM338-185     | -0.94                   | -1.6   | -1.27 | Qiyunuo10       |
|        | RM338-190     | -2.27                   | -2.19  | -2.23 | Wujing15        |
|        | RM122-150     | -5.86                   | -5.85  | -5.85 | Buxienuo        |
|        | RM122-240     | -3.48                   | -3.07  | -3.27 | Yue23           |
|        | RM3330-130    | -2.89                   | -2.98  | -2.94 | Hongyin1009     |
|        | RM3330-140    | -1.52                   | -1.16  | -1.34 | Wumangzaodao    |
|        | RM3330-145    | -0.58                   | 0.76   | 0.09  | Yue30           |
|        | RM3330-150    | -1.94                   | -1.33  | -1.64 | Qiyunuo10       |
|        | RM3330-160    | -1.01                   | -1.56  | -1.28 | Yue24           |
|        | RM3330-170    | -1.59                   | -1.34  | -1.46 | R254            |

|     |            |       |       |       |                  |
|-----|------------|-------|-------|-------|------------------|
|     | RM3330-185 | -1.73 | -1.25 | -1.49 | Jinghui418       |
|     | RM3330-195 | -1.16 | -1.54 | -1.35 | Shashani         |
|     | RM3330-335 | -6.06 | -6.77 | -6.41 | Taijing9         |
|     | RM5380-100 | -0.26 | -0.26 | -0.26 | Yue30            |
|     | RM5380-105 | -0.55 | -0.55 | -0.55 | Yangfujing8      |
|     | RM5380-110 | -0.79 | -0.79 | -0.79 | Yue96            |
|     | RM5380-80  | -1.02 | -1.02 | -1.02 | Zaoshirihuangdao |
|     | RM5380-95  | -0.58 | -0.58 | -0.58 | Qiyunuo10        |
|     | RM3533-105 | -1.63 | -1.22 | -1.42 | Zaoguangtou      |
|     | RM3533-120 | -1.35 | -1.18 | -1.27 | R254             |
|     | RM3533-130 | -2.78 | -2.83 | -2.8  | Maoguangdao      |
|     | RM3533-135 | -0.35 | -0.72 | -0.54 | Nannongjing1R    |
|     | RM3533-140 | -3.04 | -3.08 | -3.06 | Si4259           |
|     | RM3533-160 | -0.32 | -0.18 | -0.25 | Yue37            |
|     | RM3533-175 | -0.62 | 0.13  | -0.25 | Nongxiang26      |
|     | RM3533-95  | -6.41 | -6.73 | -6.57 | Ningjinghui292   |
|     | RM3600-100 | -2.09 | -3.42 | -2.76 | Si4259           |
|     | RM3600-110 | -1.61 | -1.62 | -1.62 | Nongxiang26      |
|     | RM3600-120 | -3.57 | -3.81 | -3.69 | Ningjinghui145   |
|     | RM3600-80  | -5.17 | -5.11 | -5.14 | Nannongjing002   |
|     | RM3600-90  | -1.03 | -1.98 | -1.51 | R254             |
|     | RM3600-95  | -0.25 | -0.75 | -0.5  | Qiyunuo10        |
|     | RM6160-150 | -3.12 | -4.74 | -3.93 | Sanbailitou      |
|     | RM6160-175 | -3.74 | -3.99 | -3.87 | Si4259           |
|     | RM6160-185 | -2.72 | -2.34 | -2.53 | Buxienuo         |
|     | RM6160-195 | -1.07 | -1.99 | -1.53 | Qiyunuo10        |
| 1IN | RM301-145  | -3.13 | -3.31 | -3.22 | Hongbaodao       |
|     | RM301-150  | -6.95 | -6.29 | -6.62 | Zacaodao         |
|     | RM301-160  | -2.6  | -2.48 | -2.54 | Shengdao808      |
|     | RM301-170  | -5.84 | -4.76 | -5.3  | Zhongjing212     |
|     | RM264-150  | -0.64 | -0.69 | -0.67 | Nannongjing2R    |
|     | RM264-155  | -6.52 | -5.92 | -6.22 | Zhongjing212     |
|     | RM264-165  | -4.74 | -4.45 | -4.59 | Zaoxiaobaidao    |
|     | RM264-170  | -5.73 | -5.22 | -5.48 | Nannongjing1R    |
|     | RM264-185  | -3.96 | -3.5  | -3.73 | Wumangzaodao     |
|     | RM264-190  | -4    | -4.32 | -4.16 | Yue14            |
|     | RM257-135  | -3.05 | -3.71 | -3.38 | Yue91            |
|     | RM257-150  | -0.47 | -0.7  | -0.59 | Yue21            |
|     |            |       |       |       |                  |
| 2IN | RM301-130  | 3.44  | 3.74  | 3.59  | Cungu            |
|     | RM301-140  | 1.47  | 1.36  | 1.42  | Zhonghua3        |
|     | RM301-155  | 2.37  | 2.01  | 2.19  | Yue76            |



|     |            |       |       |       |             |
|-----|------------|-------|-------|-------|-------------|
|     | RM301-180  | 5.1   | 5.36  | 5.23  | Yue23       |
|     | RM5427-145 | 1.32  | 1.19  | 1.26  | Longjing15  |
|     | RM5427-180 | 9.67  | 9.95  | 9.81  | Wanjingnuo  |
|     | RM5427-200 | 8.3   | 8     | 8.15  | Yue10(DB5)  |
|     | RM348-145  | 1.6   | 1.09  | 1.34  | Kendao12    |
|     | RM348-170  | 11.23 | 11.42 | 11.33 | Yue4        |
|     | RM122-270  | 1.01  | 1.51  | 1.26  | Yue12       |
|     | RM305-105  | 9.7   | 9.49  | 9.59  | Buxienuo    |
|     | RM305-205  | 1     | 1.8   | 1.4   | Longjing17  |
|     | RM305-270  | 1.65  | 1.46  | 1.56  | Zhonghua3   |
|     | RM512-145  | 6.41  | 6.02  | 6.22  | Yue12       |
|     | RM512-165  | 0.22  | 0.83  | 0.53  | Kendao12    |
| 3IN | RM301-130  | 5.67  | 5.5   | 5.58  | Jianongnuo2 |
|     | RM301-140  | 1.12  | 1.9   | 1.51  | Yue1        |
|     | RM301-155  | 2.63  | 2.14  | 2.39  | Baikenuo    |
|     | RM301-180  | 3.9   | 3.62  | 3.76  | Yue23       |
|     | RM348-145  | 3.73  | 3.03  | 3.38  | Longjing26  |
|     | RM348-170  | 9.82  | 9.9   | 9.86  | Yue4        |
|     | RM122-150  | 3.18  | 3.07  | 3.12  | Zhonghua3   |
|     | RM122-235  | 0.85  | 0.71  | 0.78  | Longjing28  |
|     | RM122-240  | 2.79  | 2.33  | 2.56  | Longjing26  |
|     | RM122-270  | 0.73  | 0.93  | 0.83  | Yue11       |
|     | RM305-105  | 9.79  | 9.41  | 9.6   | Wanjingnuo  |
|     | RM305-205  | 0.26  | 0.96  | 0.61  | Cbao        |
|     | RM305-270  | 2.03  | 2.18  | 2.1   | Zhonghua3   |
|     | RM3589-125 | 5.09  | 5.16  | 5.13  | Jianongnuo2 |
|     | RM3589-200 | 1.13  | 1.14  | 1.13  | Yue35       |
|     | RM3589-80  | 1.11  | 1.69  | 1.4   | Zhengdao18  |
|     | RM3589-90  | 3.26  | 3.62  | 3.44  | Hongdao35   |
|     | RM264-120  | 3.42  | 3.98  | 3.7   | Yishixing   |
|     | RM264-130  | 5.15  | 5.11  | 5.13  | Jianongnuo2 |
|     | RM264-140  | 6.29  | 6.65  | 6.47  | Yingtoudao  |
|     | RM264-160  | 3.73  | 3.74  | 3.74  | Zaijinjing  |
|     | RM264-195  | 4.37  | 4.7   | 4.53  | Baikenuo    |
|     | RM247-125  | 1.29  | 1.3   | 1.29  | Sujing353   |
|     | RM247-130  | 3.17  | 3.64  | 3.41  | H18002      |
|     | RM247-145  | 2.87  | 2.42  | 2.65  | Zhendao88   |
|     | RM247-155  | 1.16  | 1.06  | 1.11  | Longjing26  |
|     | RM247-160  | 0.12  | 0.14  | 0.13  | Cbao        |
|     | RM512-130  | 1.54  | 1.51  | 1.53  | Yue3        |
|     | RM512-145  | 4.3   | 5.53  | 4.92  | Yue11       |
|     | RM512-165  | 1.9   | 2.1   | 2     | Longjing26  |

|     |           |       |       |       |                  |
|-----|-----------|-------|-------|-------|------------------|
| 4IN | RM301-130 | 4.5   | 4.84  | 4.67  | Hongnong5        |
|     | RM301-140 | 1.7   | 1.43  | 1.57  | Yue16            |
|     | RM301-155 | 2.77  | 2.33  | 2.55  | Yue68            |
|     | RM301-180 | 2.83  | 2.46  | 2.65  | Yue23            |
|     | RM348-130 | 1.88  | -1.68 | 0.1   | Yue2             |
|     | RM348-145 | 3.1   | 3.06  | 3.08  | Longjing28       |
|     | RM348-170 | 11.13 | 14.25 | 12.69 | Yue4             |
|     | RM122-150 | 4.76  | 4.43  | 4.6   | Aijiaoluganhuang |
|     | RM122-160 | 8.65  | 8.12  | 8.39  | Yue6             |
|     | RM122-235 | 0.93  | 0.78  | 0.86  | Longjing28       |
|     | RM122-270 | 1.01  | 1.69  | 1.35  | Yue13            |
|     | RM305-105 | 9.66  | 9.22  | 9.44  | Yue6             |
|     | RM305-210 | 0.38  | 0.7   | 0.54  | Longjing28       |
|     | RM305-270 | 2.66  | 2.45  | 2.56  | Yue13            |
|     | RM598-100 | 2.76  | 2.55  | 2.66  | C418             |
|     | RM598-160 | 4.73  | 4.13  | 4.43  | Yue73            |
|     | RM598-165 | 0.64  | 0.59  | 0.61  | Longjing28       |
|     | RM598-170 | 10.89 | 10.47 | 10.68 | Yuzhenxiang      |
|     | RM598-185 | 0.27  | 0.06  | 0.16  | Nannongjing2R    |
|     | RM225-120 | 8.58  | 8.77  | 8.68  | Zhen6            |
|     | RM225-125 | 0.24  | -0.07 | 0.09  | Yue23            |
|     | RM225-190 | 5.73  | 5.09  | 5.41  | Lianjing2        |
|     | RM225-220 | 2.11  | 2.37  | 2.24  | Cbao             |
|     | RM225-225 | 0.89  | 1.82  | 1.35  | Shenlenuo        |
|     | RM225-235 | 5.63  | 5.47  | 5.55  | R254             |
|     | RM234-100 | 0.21  | 0.48  | 0.34  | Yue23            |
|     | RM234-105 | 14.01 | 14.3  | 14.15 | Buxienuo         |
|     | RM234-110 | 3.91  | 3.04  | 3.48  | Huizao           |
|     | RM234-135 | 3.17  | 3.79  | 3.48  | Baikenuo         |
|     | RM234-160 | 8.88  | 8.15  | 8.52  | Xueliqing        |
|     | RM234-210 | 8.18  | 8.19  | 8.19  | Maijieqing       |
|     | RM234-290 | 0.81  | 0.81  | 0.81  | Chiguwandao      |
|     | RM264-120 | 12.42 | 12.16 | 12.29 | Yishixing        |
|     | RM264-130 | 4.13  | 4.42  | 4.27  | Hongnong5        |
|     | RM264-140 | 7.99  | 7.39  | 7.69  | Yingtoudao       |
|     | RM264-160 | 4.71  | 4.23  | 4.47  | Zaijinjing       |
|     | RM264-195 | 3.15  | 3.67  | 3.41  | Baikenuo         |
|     | RM512-130 | 1.82  | 1.93  | 1.87  | Yue3             |
|     | RM512-145 | 5.27  | 5.28  | 5.28  | Yue13            |
|     | RM512-165 | 1.24  | 1.93  | 1.59  | Hongmangzaodao   |

---

**Table S14.** Prediction of excellent parental combinations, favorable allele number and increment for PH, 1IN, 2IN, 3IN and 4IN after pyramiding.

| Trait    | Parent/Parental combinations <sup>a</sup> | Nr. of favorable alleles predicted | Improvement predicted (cm) |
|----------|-------------------------------------------|------------------------------------|----------------------------|
| PH       | Nannongjing1R                             | 5                                  | -28.78                     |
|          | Cai1 × Huaidao9                           | 5                                  | -26.23                     |
|          | Cai1× Nannongjing2R                       | 5                                  | -30.57                     |
|          | Nannongjing2R × Huaidao9                  | 4                                  | -26.27                     |
|          | Nannongjing2R × Yue14(KDDB)               | 5                                  | -29.67                     |
| PL       | Yue38(70)                                 | 9                                  | 4.48                       |
|          | Yue96 (688) × Yue37(2)                    | 9                                  | 3.92                       |
|          | Yue96 (688) × Yue85(HT9)                  | 9                                  | 4.10                       |
|          | Yue37(2) × Yue85(HT9)                     | 8                                  | 4.47                       |
|          | Yue85(HT9) × Yue63(VN2002-1)              | 8                                  | 4.47                       |
| PL × 1IN | Yue38(70) × Heizhong                      | 12                                 | 7.63                       |
|          | Yue38(70) × Qiyunuo10                     | 12                                 | 9.38                       |
|          | Yue96 (688) × Qiyunuo10                   | 11                                 | 8.45                       |
|          | Yue37(2) × Qiyunuo10                      | 10                                 | 9.19                       |
|          | Yue38(70) × Erlibie                       | 12                                 | 7.94                       |
| 1IN      | Heizhong                                  |                                    |                            |
|          |                                           | 3                                  | 3.08                       |
|          | Qiyunuo10                                 | 3                                  | 2.45                       |
|          | Erlibie                                   | 3                                  | 1.73                       |
|          | Yilimang                                  | 3                                  | 1.60                       |
| 2IN      | Yue119 (N02)                              | 3                                  | 1.58                       |
|          | Hongyin1010                               |                                    |                            |
|          |                                           | 6                                  | -1.18                      |
|          | Hongyin1012                               | 6                                  | -1.29                      |
|          | Si4364 × Yangmiaozhong                    | 6                                  | -1.02                      |
| 3IN      | Si4364 × Aijiaoluganhuang                 | 6                                  | -2.52                      |
|          | Aijiaoluganhuang × Yangmiaozhong          | 6                                  | -2.53                      |
|          | Si4049 × Yue1 (BT1)                       | 8                                  | -2.03                      |
|          | Si4049 × Yue3(2490)                       | 8                                  | -1.84                      |
|          | Wanjingnuo × Si4049                       | 8                                  | -0.98                      |
|          | Si4161 × Wanjingnuo                       | 8                                  | -1.74                      |
|          | Si4161 × Yue1 (BT1)                       | 8                                  | -1.92                      |
|          | Si4259 × Nipponbare                       | 9                                  | -2.29                      |

|                 |                                           |                              |    |       |
|-----------------|-------------------------------------------|------------------------------|----|-------|
| 4IN             |                                           |                              |    |       |
|                 |                                           | Si4259 × Heimijingdao        | 9  | -2.39 |
|                 |                                           | Nannongjing2R × Heimijingdao | 7  | -2.63 |
|                 |                                           | Nannongjing2R × Yandao6      | 7  | -3.09 |
|                 |                                           | Heimijingdao × Yandao6       | 7  | -2.58 |
|                 |                                           |                              | 11 |       |
| 2IN × 3IN × 4IN | Aijiaoluganhuang × Si4161 × Nannongjing2R |                              |    | -9.97 |
|                 | Aijiaoluganhuang × Si4049 × Yandao6       |                              | 12 | -9.8  |
|                 | Yue1 (BT1) × Si4259 × Aijiaoluganhuang    |                              | 11 | -7.64 |
|                 | Si4364 × Nannongjing2R × Si4161           |                              | 11 | -7.39 |
|                 | Si4364 × Si4049 × Yandao6                 |                              | 12 | -7.22 |

---

We use minus “-” for the traits of “PH”, “2N”, “3IN”, and “4IN” to improve the plant height by reducing the height of the plant.

<sup>a</sup> Cultivars without the corresponding combination for cross, means this cultivar possess all of the favorable alleles at all their loci combined into a single cultivar.

**Table S15.** Favorable alleles carried by the superior parents for PH with its component traits and corresponding phenotypic effect.

| Trait | Super parent     | Locus-allele (Corresponding phenotypic effect value) |                   |                   |                   |
|-------|------------------|------------------------------------------------------|-------------------|-------------------|-------------------|
| PH    | Nannongjing1R    | RM301-150(-24.05)<br>RM512-220(-24.00)               | RM348-155(-22.62) | RM305-210(-51.42) | RM264-170(-21.81) |
|       | Cai1             | RM301-150(-24.05)                                    | RM348-155(-22.62) | RM305-210(-51.42) | RM512-220(-24.00) |
|       | Huaidao9         | RM301-145(-14.99)                                    | RM305-215(-37.11) | RM264-185(-13.70) |                   |
|       | Nannongjing2R    | RM301-150(-24.05)                                    | RM305-205(-41.39) | RM264-150(-33.02) | RM512-220(-24.00) |
|       | Yue14(KDDB)      | RM348-130(-33.19)                                    | RM264-190(-24.24) |                   |                   |
| PL    | Yue38(70)        | RM1-100(4.70)                                        | RM583-180(3.24)   | RM338-175(5.39)   | RM122-235(1.71)   |
|       |                  | RM3330-120(3.45)                                     | RM5380-115(8.58)  | RM3533-190(5.54)  | RM3600-125(2.50)  |
|       |                  | RM6160-160(5.17)                                     |                   |                   |                   |
|       | Yue96 (688)      | RM1-360(2.70)                                        | RM583-180(3.24)   | RM338-135(2.95)   | RM122-235(1.71)   |
|       |                  | RM3330-135(7.44)                                     | RM3533-125(1.76)  | RM3600-170(3.40)  | RM6160-160(5.17)  |
|       | Yue37(2)         | RM583-180(3.24)                                      | RM338-175(5.39)   | RM122-235(1.71)   | RM3330-120(3.45)  |
|       |                  | RM5380-115(8.58)                                     | RM3600-125(2.50)  | RM6160-160(5.17)  |                   |
|       | Yue85(HT9)       | RM583-180(3.24)                                      | RM338-135(2.95)   | RM122-235(1.71)   | RM3330-135(7.44)  |
|       |                  | RM5380-115(8.58)                                     | RM3533-125(1.76)  | RM3600-170(3.40)  | RM6160-160(5.17)  |
|       | Yue63(VN2002-1)  | RM583-180(3.24)                                      | RM338-175(5.39)   | RM122-235(1.71)   | RM3330-110(3.44)  |
|       |                  | RM3533-220(9.44)                                     | RM3600-125(2.50)  |                   |                   |
| 1IN   | Heizhong         | RM301-155(4.89)                                      | RM264-120(10.42)  | RM258-130(3.15)   |                   |
|       | Qiyunuo10        | RM301-13(5.89)                                       | RM264-130(5.67)   | RM258-130(3.15)   |                   |
|       | Erlibie          | RM301-155(4.89)                                      | RM264-195(5.26)   | RM258-140(0.25)   |                   |
|       | Yilimang         | RM301-155(4.89)                                      | RM264-140(4.46)   | RM258-140(0.25)   |                   |
|       | Yue119 (N02)     | RM301-155(4.89)                                      | RM264-180(1.42)   | RM258-130(3.15)   |                   |
| 2IN   | Hongyin1010      | RM301-150(-1.37)                                     | RM5427-115(-1.42) | RM348-155(-1.22)  | RM122-235(-0.27)  |
|       |                  | RM305-210(-1.44)                                     | RM512-220(-1.36)  |                   |                   |
|       | Hongyin1012      | RM301-150(-1.37)                                     | RM5427-140(-2.05) | RM348-155(-1.22)  | RM122-235(-0.27)  |
|       |                  | RM305-210(-1.44)                                     | RM512-220(-1.36)  |                   |                   |
|       | Si4364           | RM301-150(-1.37)                                     | RM5427-135(-0.68) | RM348-155(-1.22)  | RM122-240(-0.42)  |
|       |                  | RM512-220(-1.36)                                     |                   |                   |                   |
|       | Yangmiaozechong  | RM301-160(-2.28)                                     | RM5427-120(-0.65) | RM348-135(-0.46)  | RM122-235(-0.27)  |
|       |                  | RM305-210(-1.44)                                     |                   |                   |                   |
|       | Aijiaoluganhuang | RM5427-175(-1.20)                                    | RM348-130(-7.48)  | RM122-150(-3.45)  | RM305-370(-2.47)  |
|       |                  | RM512-115(-5.55)                                     |                   |                   |                   |
|       | Wanjingnuo       | RM122-180(-1.41)                                     | RM3589-100(-0.28) | RM247-135(-1.27)  |                   |
|       | Yue1 (BT1)       | RM122-180(-1.41)                                     | RM305-370(-0.93)  | RM3589-100(-0.28) | RM247-135(-1.27)  |
|       |                  | RM512-115(-2.44)                                     |                   |                   |                   |

|     |              |                  |                  |                   |                   |
|-----|--------------|------------------|------------------|-------------------|-------------------|
| 3IN | Si4049       | RM301-150(-3.72) | RM348-155(-3.42) | RM305-215(-3.47)  | RM3589-100(-0.28) |
|     |              | RM264-170(-2.40) | RM247-150(-1.97) | RM512-220(-3.78)  |                   |
|     | Si4161       | RM301-150(-3.72) | RM348-155(-3.42) | RM305-215(-3.47)  | RM3589-100(-0.28) |
|     |              | RM264-185(-2.35) | RM247-170(-2.58) | RM512-220(-3.78)  |                   |
|     | Yue3(2490)   | RM122-180(-1.41) | RM305-370(-0.93) | RM3589-100(-0.28) | RM247-135(-1.27)  |
| 4IN | Si4259       | RM301-150(-3.45) | RM348-155(-3.32) | RM122-240(-2.29)  | RM305-215(-2.58)  |
|     |              | RM225-155(-1.85) | RM234-130(-1.95) | RM264-185(-2.38)  | RM512-220(-3.39)  |
|     | Nipponbare   | RM301-145(-3.19) | RM305-205(-0.14) | RM598-180(-3.42)  | RM225-135(-0.49)  |
|     |              | RM234-130(-1.95) | RM264-185(-2.38) |                   |                   |
|     | Heimijingdao | RM301-150(-3.45) | RM305-205(-0.14) | RM598-180(-3.42)  | RM225-145(-2.01)  |
|     |              | RM234-150(-0.05) | RM264-185(-2.38) | RM512-220(-3.39)  |                   |
|     | NannongingR2 | RM301-150(-3.45) | RM305-205(-0.14) | RM225-155(-1.85)  | RM234-125(-2.81)  |
|     |              | RM264-150(-7.19) | RM512-220(-3.39) |                   |                   |
|     | Yandao6      | RM301-145(-3.19) | RM305-215(-2.58) | RM598-180(-3.42)  | RM225-175(-4.77)  |
|     |              | RM234-130(-1.95) | RM264-185(-2.38) |                   |                   |

---
